# Supplementary material for: Comparative Efficacy of Brolucizumab in the Treatment of Neovascular Age-Related Macular Degeneration: A Systematic Literature Review and Network Meta-Analysis
Source: PubMed Central journal article supplement — Adv Ther. 2022 Jun 9;39(8):3425–48. doi: 10.1007/s12325-022-02193-3 (PMC9309118; doi:10.1007/s12325-022-02193-3), 2022-06-09
Supplement: 12325_2022_2193_MOESM1_ESM.pdf [file 12325_2022_2193_MOESM1_ESM.pdf]

# Supplementary Material

## **Comparative Efficacy of Brolucizumab in the Treatment of Neovascular Age-Related Macular Degeneration: A Systematic Literature Review and Network Meta-Analysis**

Robert P. Finger<sup>1</sup>, Natalie Dennis<sup>2</sup>, Rita Freitas<sup>3</sup>, Arthur Quenéchdu<sup>4</sup>, Andreas Clemens<sup>5,6</sup>, Helene Karcher<sup>5</sup>, Eric H. Souied<sup>7,8</sup>

<sup>1</sup>Department of Ophthalmology, University of Bonn, Bonn, Germany

<sup>2</sup>Amaris, Health Economics and Market Access, Paris, France

<sup>3</sup>Novartis Farma – Produtos Farmacêuticos S.A., Porto Salvo, Portugal

<sup>4</sup>Amaris, Health Economics and Market Access, Montréal, Canada

<sup>5</sup>Novartis Pharma AG, Basel, Switzerland

<sup>6</sup>Department of Cardiology and Angiology I, Heart Center Freiburg University, Faculty of Medicine, University of Freiburg, Germany

<sup>7</sup>Department of Ophthalmology, Centre Hospitalier Intercommunal de Créteil, University Paris Est Créteil, Créteil, France

<sup>8</sup>Clinical Research Center, GRC Macula, and Biological Ressources Center, Centre Hospitalier Intercommunal de Créteil, Créteil, France

### **Corresponding author**

Prof. Dr. Robert Finger

Email address: robert.finger@ukbonn.de

Search strings

Table S 1. Search strategy using EMBASE via www.embase.com

| PICOS component                      | #   | Search terms                                                                                                                   | # of Hits |
|--------------------------------------|-----|--------------------------------------------------------------------------------------------------------------------------------|-----------|
| <b>Disease: nAMD</b>                 | #1  | 'macular degeneration'/exp OR 'macular degeneration':ti,ab                                                                     | 43,234    |
|                                      | #2  | 'retinal degeneration'/exp OR 'retinal degeneration':ti,ab                                                                     | 66,544    |
|                                      | #3  | 'choroidal neovascular*'                                                                                                       | 10,143    |
|                                      | #4  | 'macula lutea'/exp                                                                                                             | 12,372    |
|                                      | #5  | 'retinal drusen'/exp                                                                                                           | 3,572     |
|                                      | #6  | (neovascular OR exudative) AND degener*                                                                                        | 10,088    |
|                                      | #7  | (macul* OR retina* OR choroid* OR wet) AND degener*                                                                            | 73,419    |
|                                      | #8  | (macul* OR retina* OR choroid*) AND neovasc*                                                                                   | 30,006    |
|                                      | #9  | maculopath* OR drusen*                                                                                                         | 15,107    |
|                                      | #10 | macul* AND (lutea* OR syndrome)                                                                                                | 24,407    |
|                                      | #11 | macul* AND dystroph*                                                                                                           | 5,063     |
|                                      | #12 | (macul* OR 'geography') AND atroph*                                                                                            | 8,821     |
|                                      | #13 | choroid* AND polyp*                                                                                                            | 2,463     |
|                                      | #14 | amd OR armd OR namd                                                                                                            | 25,279    |
|                                      | #15 | retina* AND angiomat* AND prolifer*                                                                                            | 540       |
|                                      | #16 | #1 OR #2 OR #3 OR #4 OR #5 OR #6 OR #7 OR #8 OR #9 OR #10 OR #11 OR #12 OR #13 OR #14 OR #15                                   | 8137,777  |
|                                      | #17 | 'acid mine drainage'                                                                                                           | 2,305     |
|                                      | #18 | #16 NOT #17                                                                                                                    | 136,815   |
| <b>Interventions and Comparators</b> | #19 | 'brolocizumab'/exp OR brolocizumab:ti,ab,tn OR esba1008 OR dlx1008                                                             | 190       |
|                                      | #20 | 'ranibizumab'/exp OR ranibizumab:ti,ab,tn OR lucentris:ti,ab,tn OR rg3645:ti,ab,tn                                             | 10,731    |
|                                      | #21 | 'bevacizumab'/exp OR bevacizumab:ti,ab,tn OR avastin:ti,ab,tn OR 'rhumbab-vegf':ti,ab,tn                                       | 63,547    |
|                                      | #22 | 'aflibercept'/exp OR aflibercept:ti,ab,tn OR eylae:ti,ab,tn OR 'bay865321':ti,ab,tn OR pegaptanib:ti,ab,tn OR macugen:ti,ab,tn | 8,211     |
|                                      | #23 | trapeye*:ti,ab,tn OR 'trap eye*':ti,ab,tn                                                                                      | 97        |
|                                      | #24 | 'photochemotherapy'/exp OR photochemotherapy:ti,ab OR 'photodynamic therapy'/exp OR 'photodynamic therapy':ti,ab               | 48,978    |
|                                      | #25 | 'macul* surger*'                                                                                                               | 282       |
|                                      | #26 | verteporfin:ti,ab,tn OR visudyne:ti,ab,tn                                                                                      | 2,598     |
|                                      | #27 | #19 OR #20 OR #21 OR #22 OR #23 OR #24 or #25 or #26                                                                           | 119,582   |
| <b>Study type</b>                    | #28 | 'clinical trial'/exp                                                                                                           | 1,610,710 |
|                                      | #29 | 'randomized controlled trial'/exp                                                                                              | 661,306   |

|                                            |                                                                                                                                            |            |
|--------------------------------------------|--------------------------------------------------------------------------------------------------------------------------------------------|------------|
|                                            | #30 'randomization'/exp                                                                                                                    | 91,042     |
|                                            | #31 'single blind procedure'/exp                                                                                                           | 42,856     |
|                                            | #32 'double blind procedure'/exp                                                                                                           | 184,824    |
|                                            | #33 'crossover procedure'/exp                                                                                                              | 67,005     |
|                                            | #34 'multicenter study'/exp                                                                                                                | 287,798    |
|                                            | #35 'comparative study'/exp                                                                                                                | 1,507,390  |
|                                            | #36 'placebo'/exp                                                                                                                          | 374,131    |
|                                            | #37 'randomi*ed controlled trial*':ti,ab,kw                                                                                                | 265,300    |
|                                            | #38 rct:ti,ab,kw                                                                                                                           | 44,635     |
|                                            | #39 'random* allocat*':ti,ab,kw                                                                                                            | 41,770     |
|                                            | #40 'allocated randomly':ti,ab,kw                                                                                                          | 2,677      |
|                                            | #41 (allocated NEXT/2 random):ti,ab,kw                                                                                                     | 881        |
|                                            | #42 'single blind*':ti,ab,kw                                                                                                               | 27,027     |
|                                            | #43 'double blind*':ti,ab,kw                                                                                                               | 222,153    |
|                                            | #44 ((treble OR triple) NEXT/1 blind*):ti,ab,kw                                                                                            | 1,385      |
|                                            | #45 'placebo*':ti,ab,kw                                                                                                                    | 327,404    |
|                                            | #46 'prospective study'/exp                                                                                                                | 688,170    |
|                                            | #28 OR #29 OR #30 OR #31 OR #32 OR #33 OR<br>#34 OR #35 OR #36 OR #37 OR #38 OR #39 OR<br>#40 OR #41 OR #42 OR #43 OR #44 OR #45 OR<br>#46 | 3,814,977  |
|                                            | #48 'case study'/exp                                                                                                                       | 78,232     |
|                                            | #49 'case report':ti,ab                                                                                                                    | 464,231    |
|                                            | #50 'abstract report'/exp OR 'letter'/exp                                                                                                  | 1,201,385  |
|                                            | #51 'conference proceeding':it                                                                                                             | 0          |
|                                            | #52 'conference abstract':it                                                                                                               | 4,103,001  |
|                                            | #53 'editorial':it                                                                                                                         | 686,637    |
|                                            | #54 'letter':it                                                                                                                            | 1,162,760  |
|                                            | #55 'note':it                                                                                                                              | 843,361    |
|                                            | #48 OR #49 OR #50 OR #51 OR #52 OR #53 OR<br>#54 OR #55                                                                                    | 7,303,783  |
|                                            | #47 NOT #56                                                                                                                                | 3,014,281  |
| <b>Disease, Treatments,<br/>Study Type</b> | #18 AND #27 AND #57                                                                                                                        | 3,224      |
|                                            | #59 'animal'/exp                                                                                                                           | 29,069,630 |
| <b>Remove Animal<br/>Studies</b>           | #60 'human'/exp                                                                                                                            | 23,451,941 |
|                                            | #61 #59 NOT #60                                                                                                                            | 5,617,689  |
|                                            | #62 #58 NOT #61                                                                                                                            | 3,199      |
| <b>Limit to English and<br/>Date</b>       | #62 AND [english]/lim AND [10-9-2018]/sd NOT<br>[13-6-2019]/sd                                                                             | 265        |

Date of search: 03/06/2021

Table S 2. Search strategy using MEDLINE and MEDLINE-IN-PROCESS via www.pubmed.com

| PICOS Component                      | Search Terms                                                                                                                                        | # of Hits |
|--------------------------------------|-----------------------------------------------------------------------------------------------------------------------------------------------------|-----------|
| <b>Disease: nAMD</b>                 | #1 “macular degeneration”[TIAB] OR “macular degeneration”[MH]                                                                                       | 34,344    |
|                                      | #2 “retinal degeneration”[TIAB] OR “retinal degeneration”[MH]                                                                                       | 47,274    |
|                                      | #3 "Choroidal Neovascular*" [MH] OR "Macula lutea" [MH] OR "Retinal drusen" [MH]                                                                    | 20,164    |
|                                      | #4 (neovascular[TIAB] OR exudative[TIAB]) AND degener*[TIAB]                                                                                        | 7,047     |
|                                      | #5 (macul*[TIAB] OR retina*[TIAB] OR choroid*[TIAB] OR wet[TIAB]) AND (degener*[TIAB])                                                              | 39,213    |
|                                      | #6 (macul*[TIAB] OR retina*[TIAB] OR choroid*[TIAB]) AND (neovasc*[TIAB])                                                                           | 17,616    |
|                                      | #7 maculopath*[TIAB] OR drusen*[TIAB]                                                                                                               | 7,893     |
|                                      | #8 macul*[TIAB] AND (lutea*[TIAB] OR syndrome[TIAB])                                                                                                | 4,452     |
|                                      | #9 macul*[TIAB] AND dystroph*[TIAB]                                                                                                                 | 2,937     |
|                                      | #10 ((macul*[TIAB] OR geographic*[TIAB]) AND atroph*[TIAB])                                                                                         | 5,155     |
|                                      | #11 choroid*[TIAB] AND polyp*[TIAB]                                                                                                                 | 1,631     |
|                                      | #12 AMD[TIAB] OR ARMD[TIAB] OR nAMD[TIAB]                                                                                                           | 15,389    |
|                                      | #13 retina*[TIAB] AND angiomat*[TIAB] AND prolifer*[TIAB]                                                                                           | 380       |
|                                      | #14 #1 OR #2 OR #3 OR #4 OR #5 OR #6 OR #7 OR #8 OR #9 OR #10 OR #11 OR #12 OR #13                                                                  | 892,703   |
|                                      | #15 acid mine drainage                                                                                                                              | 1,687     |
|                                      | #16 #14 NOT #15                                                                                                                                     | 91,855    |
| <b>Interventions and Comparators</b> | #17 Brolucizumab[TIAB] OR Brolucizumab[MH] OR esba1008[TIAB] OR dlx1008[TIAB]                                                                       | 94        |
|                                      | #18 Ranibizumab[TIAB] OR ranibizumab[MH] OR lucentis[TIAB] OR lucentis[MH] OR RG3645[TIAB]                                                          | 5,310     |
|                                      | #19 bevacizumab[TIAB] OR bevacizumab[MH] OR Avastin[TIAB] OR Avastin[MH] OR "rhuMab-VEGF"[TIAB]                                                     | 19,603    |
|                                      | #20 Aflibercept[TIAB] OR aflibercept[MH] OR Eylea[TIAB] OR "BAY86-5321"[TIAB] OR pegaptanib[TIAB] OR pegaptanib[MH] OR macugen[TIAB] OR macugen[MH] | 2,765     |
|                                      | #21 "Trap Eye*" [TIAB] OR Trap-Eye* [TIAB]                                                                                                          | 52        |

|                                                   |                                                                                                           |            |
|---------------------------------------------------|-----------------------------------------------------------------------------------------------------------|------------|
|                                                   | photochemotherapy[TIAB] OR                                                                                | 30,040     |
|                                                   | #22 photochemotherapy[MH] OR "photodynamic therapy"[TIAB] OR "photodynamic therap"[MH]                    |            |
|                                                   | #23 macul*[TIAB] AND surger*[TIAB]                                                                        | 8,066      |
|                                                   | #24 verteporfin[TIAB] OR visudyne[TIAB]                                                                   | 1,607      |
|                                                   | #25 #17 OR #18 OR #19 OR #20 OR #21 OR #22 OR #23 OR #24                                                  | 61,418     |
|                                                   | #26 Randomized Controlled Trials as Topic[MH]                                                             | 147,879    |
|                                                   | #27 randomized controlled trial[MH]                                                                       | 147,879    |
|                                                   | #28 random allocation[MH]                                                                                 | 105,411    |
|                                                   | #29 single blind method[MH]                                                                               | 30,280     |
|                                                   | #30 double blind method[MH]                                                                               | 164,733    |
|                                                   | #31 Clinical trial[MH]                                                                                    | 358,078    |
|                                                   | #32 "clinical trial, phase I"[PT]                                                                         | 21,685     |
|                                                   | #33 "clinical trial, phase II"[PT]                                                                        | 34,932     |
|                                                   | #34 "clinical trial, phase III"[PT]                                                                       | 18,468     |
|                                                   | #35 "clinical trial, phase IV"[PT]                                                                        | 2,107      |
|                                                   | #36 "controlled clinical trial"[PT]                                                                       | 623,044    |
|                                                   | #37 "randomized controlled trial"[PT]                                                                     | 533,728    |
|                                                   | #38 "multicenter study"[PT]                                                                               | 295,484    |
|                                                   | #39 "clinical trial"[PT]                                                                                  | 895,068    |
| <b>Study Type<br/>(modified SIGN<br/>Filters)</b> | #40 Clinical trials as topic[MeSH Terms]                                                                  | 358,078    |
|                                                   | #41 #26 OR #27 OR #28 OR #29 OR #30 OR #31 OR #32 OR #33 OR #34 OR #35 OR #36 OR #37 OR #38 OR #39 OR #40 | 1,433,093  |
|                                                   | #42 "clinical trial*"[TW]                                                                                 | 1,066,906  |
|                                                   | #43 "single blind*"[TW] OR "double blind*"[TW] OR "treble blind*"[TW] OR "triple blind*"[TW]              | 246,494    |
|                                                   | #44 Placebos[MeSH]                                                                                        | 38,241     |
|                                                   | #45 Placebo*[TW]                                                                                          | 239,887    |
|                                                   | #46 "allocated random*"[TW]                                                                               | 0          |
|                                                   | #47 #42 OR #43 OR #44 OR #45 OR #46                                                                       | 1,232,802  |
|                                                   | #48 #41 OR #47                                                                                            | 1,725,992  |
|                                                   | #49 "case report"[TW]                                                                                     | 338,208    |
| #50 Letter/                                       | 1,207,889                                                                                                 |            |
| #51 Historical article/                           | 402,932                                                                                                   |            |
| #52 #49 OR #50 OR #51                             | 1,930,182                                                                                                 |            |
| #53 #48 NOT #52                                   | 1,680,722                                                                                                 |            |
| <b>Disease,<br/>Treatments, Study<br/>Type</b>    | #16 AND #25 AND #53                                                                                       | 2,534      |
|                                                   | #54                                                                                                       |            |
| <b>Remove Animal<br/>Studies</b>                  | #55 animal/                                                                                               | 7,056,387  |
|                                                   | #56 human/                                                                                                | 20,118,108 |
|                                                   | #57 #55 NOT #56                                                                                           | 4,593,432  |
|                                                   | #58 #54 NOT #57                                                                                           | 2,520      |

---

|                         |                                              |            |
|-------------------------|----------------------------------------------|------------|
| <b>Limit to English</b> | #59 English[Language]                        | 27,871,083 |
|                         | #60 #58 AND #59                              | 2,316      |
| <b>Date Restriction</b> | #61 #60 AND ("2020/05"[Date - Publication] : | 149        |
|                         | "2021/06"[Date - Publication])               |            |

---

Date of search: 03/06/2021

Networks for all endpoints of the network meta-analysis  
 Figure S 1. Network for mean change in BCVA at 2 years

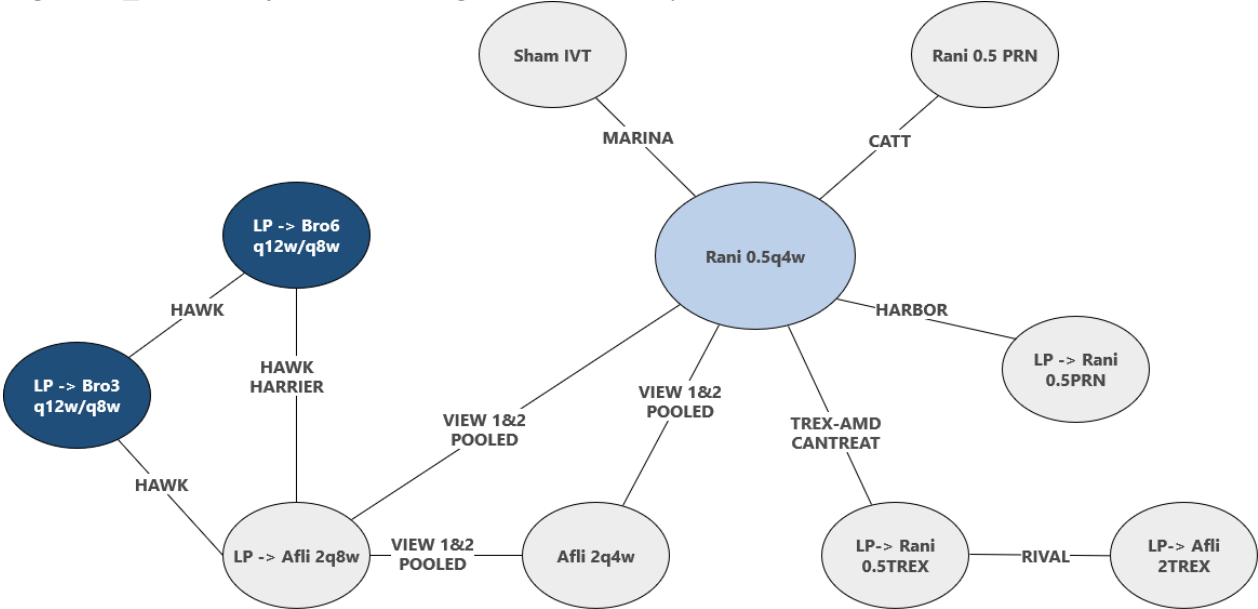

Figure S 2. Network for mean change in retinal thickness at 1 year

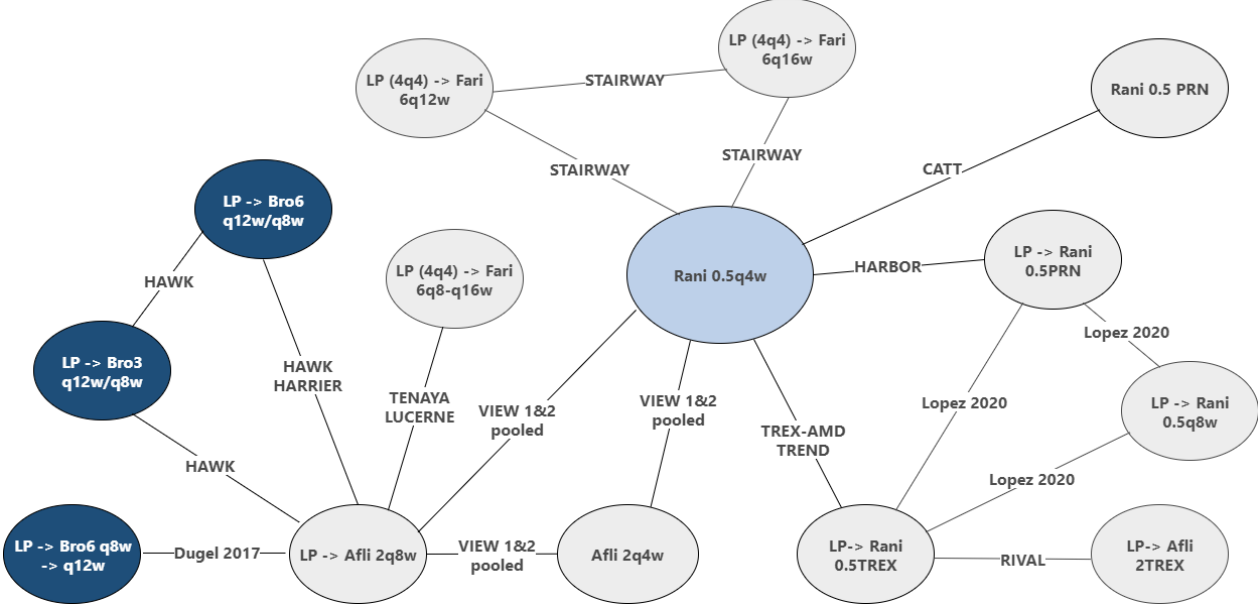



Figure S 3. Network for mean change in retinal thickness at 2 years

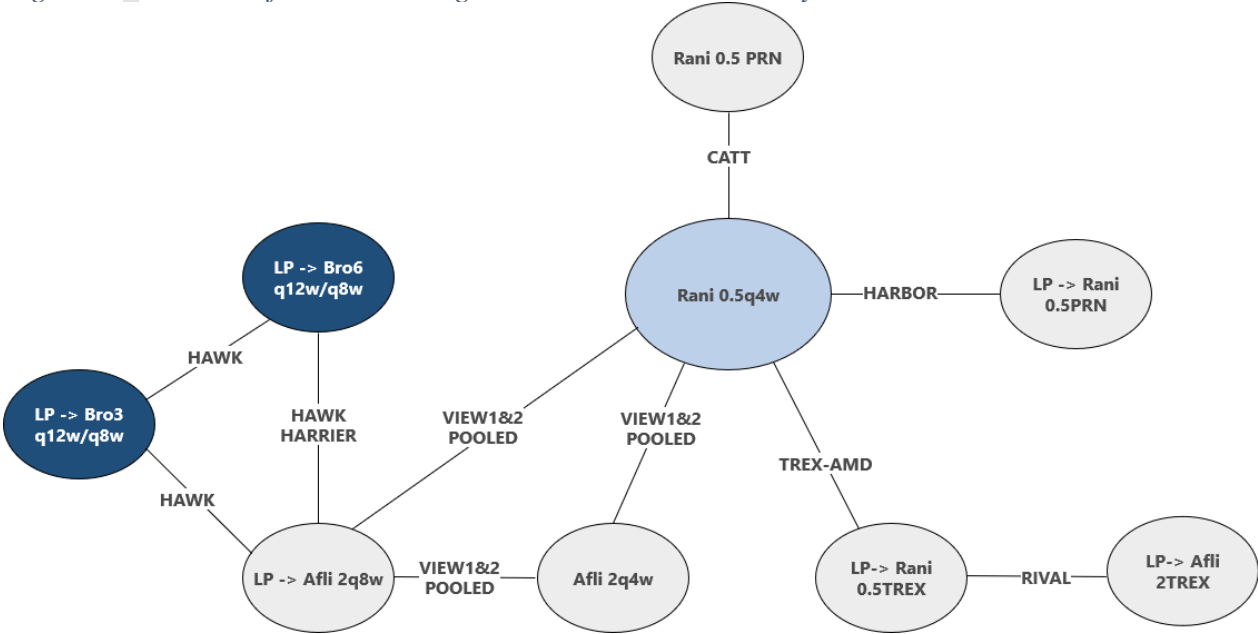

Figure S 4. Network for patients losing at least 15 letters at 1 year

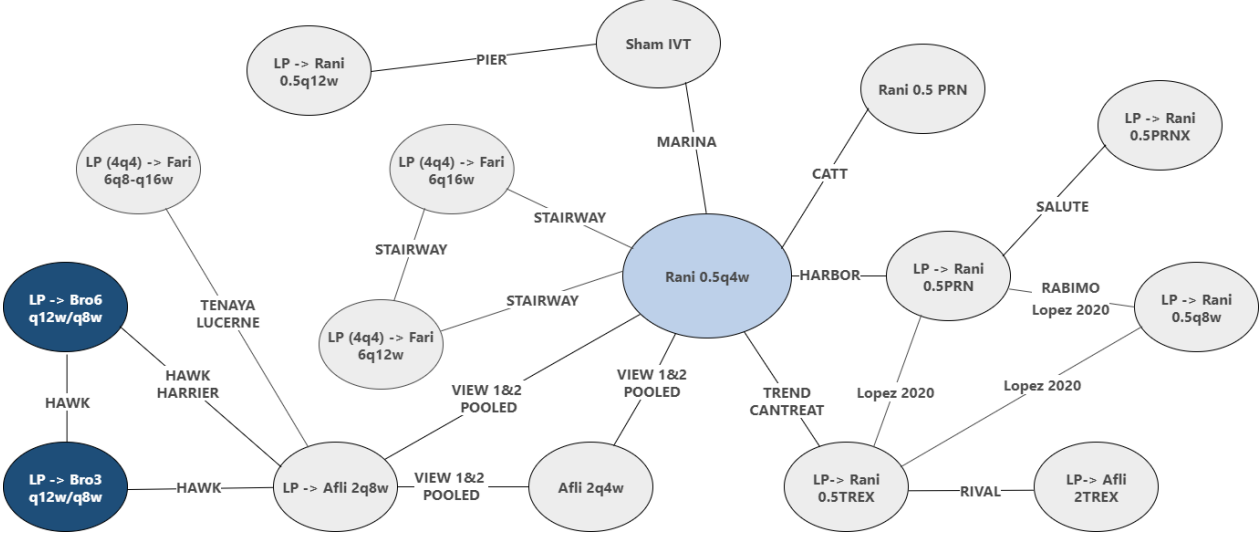

Figure S 5. Network for patients losing at least 15 letters at 2 years

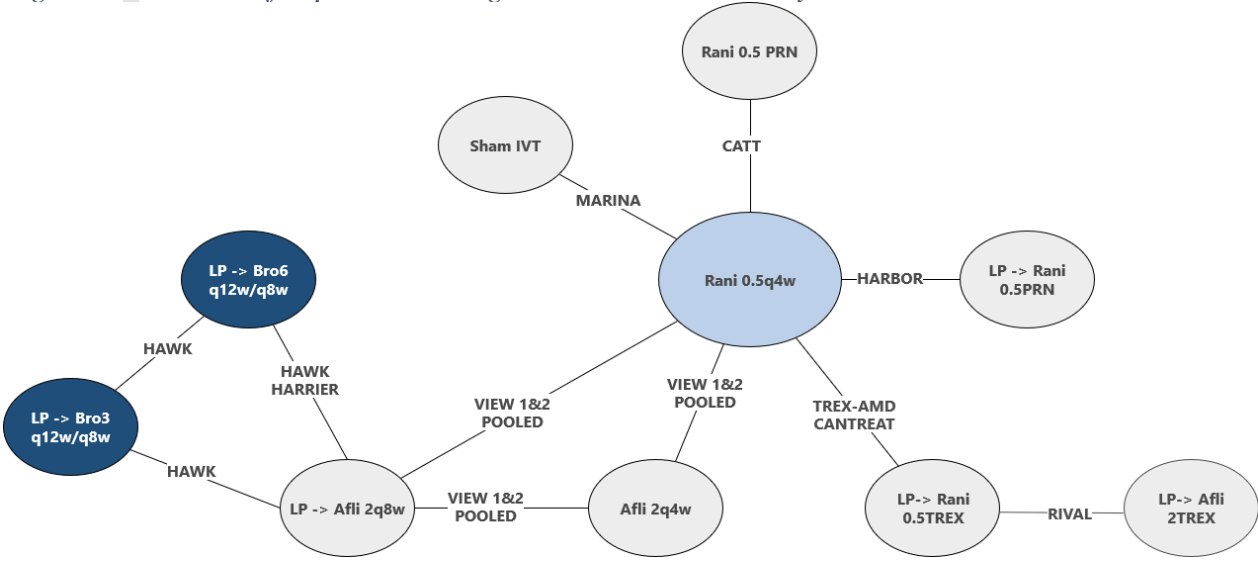

Figure S 6. Network for patients gaining at least 15 letters at 1 year

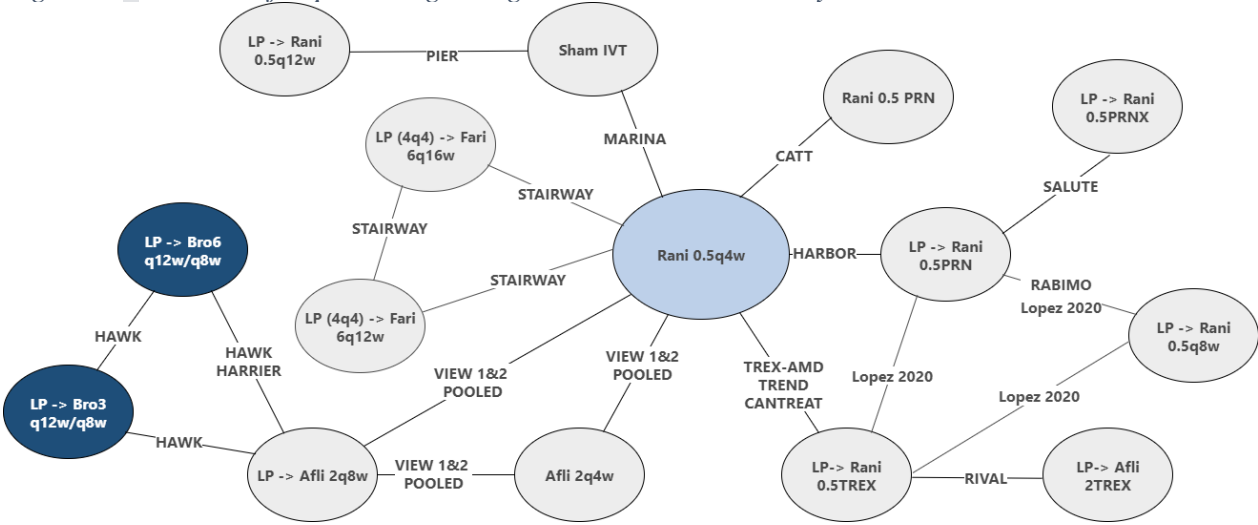

Figure S 7. Network for patients gaining at least 15 letters at 2 years

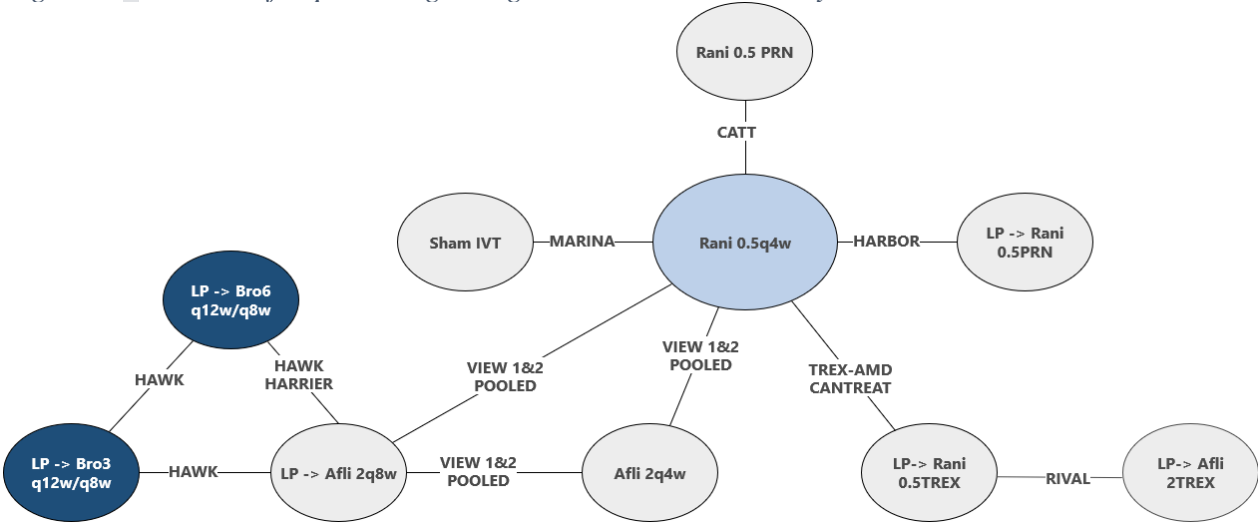

Figure S 8. Network for discontinuation at 1 year

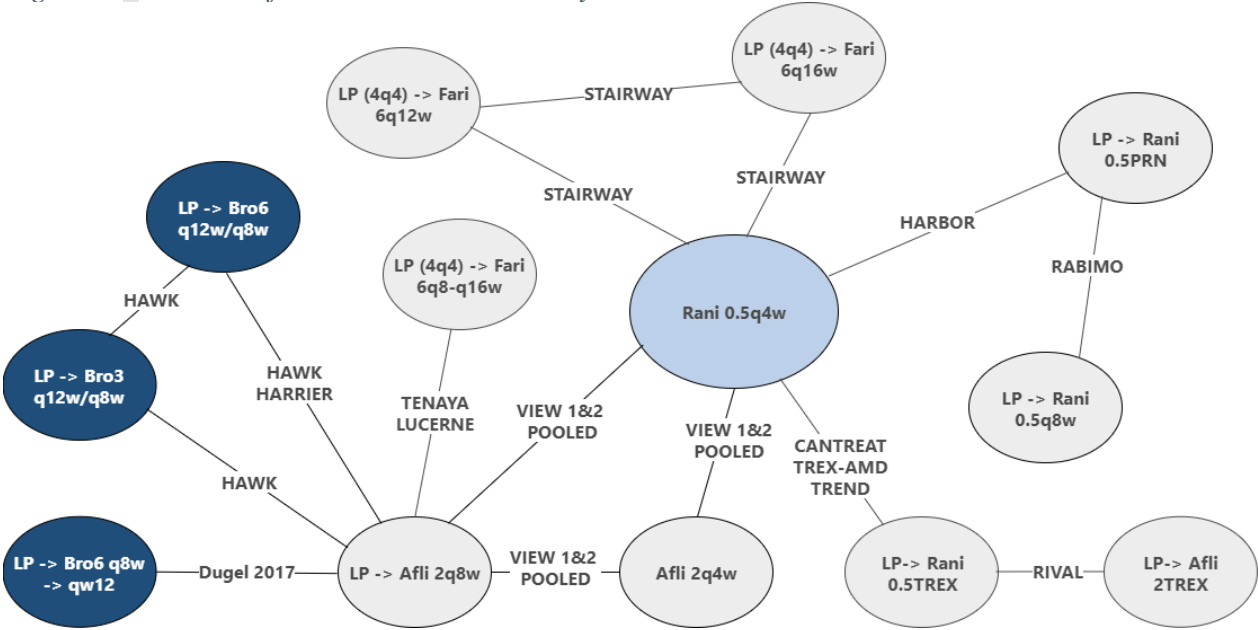

Figure S 9. Network for discontinuation at 2 years

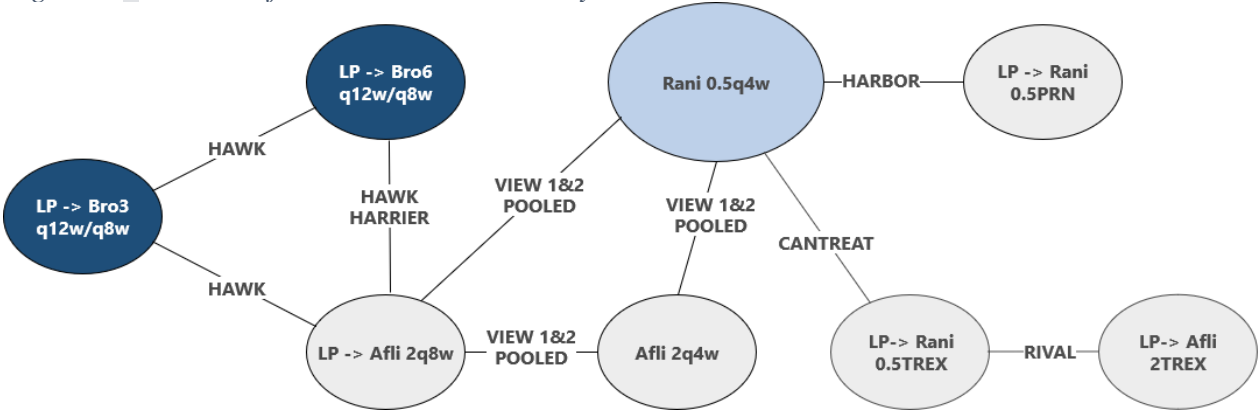

Inconsistency assessment results

Table S 3. Results from the inconsistency assessment for all endpoints of the network meta-analyses

| <b>Loop / Endpoint</b>                                                                | <b>Difference (SE) -<br/>Direct vs. indirect<br/>comparison</b> | <b>Z-score</b> | <b>P-value</b> |
|---------------------------------------------------------------------------------------|-----------------------------------------------------------------|----------------|----------------|
| <b>Loop with LP -&gt; Afli 2q8, LP -&gt; Bro 6q12/q8, and LP -&gt; Bro 3q12/q8</b>    |                                                                 |                |                |
| Change in BCVA                                                                        |                                                                 |                |                |
| 1 year                                                                                | 0.23 (1.19)                                                     | 0.19           | 0.846          |
| 2 years                                                                               | 0.59 (1.34)                                                     | 0.44           | 0.662          |
| 1->2 years                                                                            | 0.38 (1.62)                                                     | 0.30           | 0.763          |
| Change in retinal thickness                                                           |                                                                 |                |                |
| 1 year                                                                                | 10.18 (11.79)                                                   | 0.86           | 0.388          |
| 2 years                                                                               | 8.59 (12.41)                                                    | 0.69           | 0.489          |
| Patients gaining $\geq 15$ letters                                                    |                                                                 |                |                |
| 1 year                                                                                | 0.21 (0.26)                                                     | 0.81           | 0.420          |
| 2 years                                                                               | 0.22 (0.25)                                                     | 0.86           | 0.387          |
| Patients losing $\geq 15$ letters                                                     |                                                                 |                |                |
| 1 year                                                                                | 0.18 (0.26)                                                     | 0.35           | 0.727          |
| 2 years                                                                               | 0.08 (0.43)                                                     | 0.18           | 0.855          |
| Discontinuation                                                                       |                                                                 |                |                |
| 1 year                                                                                | -0.11 (0.40)                                                    | -0.28          | 0.781          |
| 2 years                                                                               | 0.01 (0.30)                                                     | 0.02           | 0.982          |
| <b>Loop with Rani 0.5q4, LP -&gt; Rani 0.5TREX, and LP -&gt; Rani 0.5PRN (1 year)</b> |                                                                 |                |                |
| Change in BCVA                                                                        | -2.77 (2.54)                                                    | -1.09          | 0.276          |
| Change in retinal thickness                                                           | -13.05 (25.46)                                                  | -0.51          | 0.608          |
| Patients gaining $\geq 15$ letters                                                    | -0.73 (0.39)                                                    | -1.89          | 0.059          |
| Patients losing $\geq 15$ letters                                                     | 0.03 (0.84)                                                     | 0.03           | 0.973          |



Heterogeneity assessment results

Table S 4. Summary of direct comparison results for mean change in BCVA at 1 year

| Comparison                                        | Trials                                 | Mean diff [95% CI]  |                      | I-square | P-value of the Cochran test |
|---------------------------------------------------|----------------------------------------|---------------------|----------------------|----------|-----------------------------|
|                                                   |                                        | Fixed-effects model | Random-effects model |          |                             |
| LP -> Rani<br>0.5TREX vs. Rani<br>0.5q4           | TREND<br>TREX-<br>AMD<br>CAN-<br>TREAT | 0.26 [-1.08; 1.61]  | 0.32 [-3.20; 3.84]   | 78.83%   | 0.009 <sup>+</sup>          |
| Rani 0.5q4 vs<br>LP-> Afli 2q8                    | VIEW 1<br>VIEW 2                       | 0.36 [-1.28; 2.00]  | 0.36 [-1.28; 2.00]   | 0.00%    | 0.858                       |
| Rani 0.5q4 vs.<br>Afli 2q4                        | VIEW 1<br>VIEW 2                       | -0.26 [-1.81; 1.29] | -0.47 [-4.98; 4.04]  | 88.03%   | 0.004 <sup>+</sup>          |
| LP -> Afli 2q8 vs.<br>Afli 2q4                    | VIEW 1<br>VIEW 2                       | -0.70 [-2.26; 0.87] | -0.83 [-5.04; 3.38]  | 86.14%   | 0.007 <sup>+</sup>          |
| LP -> Afli 2q8 vs.<br>LP -> Bro 6q12/q8           | HARRIER<br>HAWK                        | 0.43 [-0.85; 1.71]  | 0.43 [-0.85; 1.71]   | 0.00%    | 0.762                       |
| LP -> Afli 2q8 vs.<br>LP (4q4) -> Fari<br>6q8-q16 | TENAYA<br>LUCERNE                      | -0.2 [-1.54;1.14]   | -0.2 [-1.54;1.14]    | 0.00%    | 0.884                       |

Table S 5. Summary of direct comparisons results for mean change in BCVA at 2 years

| Comparison                           | Included trials               | Mean diff (95% CI)  |                      | I-square | P-value Cochran test |
|--------------------------------------|-------------------------------|---------------------|----------------------|----------|----------------------|
|                                      |                               | Fixed-effects model | Random-effects model |          |                      |
| LP -> Bro 6q12/q8 vs. LP -> Afli 2q8 | HARRIER<br>HAWK               | 0.01 [-1.46;1.49]   | 0.01 [-1.46;1.49]    | 0.00%    | 0.467                |
| LP -> Rani 0.5TREX vs. Rani 0.5q4    | TREX-<br>AMD<br>CAN-<br>TREAT | 0.42 [-1.67;2.50]   | -0.11 [-3.66;3.43]   | 28.43%   | 0.237                |

Table S 6. Summary of direct comparison results for mean change in retinal thickness at 1 year

| Comparison                               | Trials                | Mean diff [95% CI]     |                         | I-square | P-value<br>Cochran<br>test |
|------------------------------------------|-----------------------|------------------------|-------------------------|----------|----------------------------|
|                                          |                       | Fixed-effects model    | Random-effects<br>model |          |                            |
| LP -> Rani<br>0.5TREX vs. Rani<br>0.5q4  | TREND<br>TREX-<br>AMD | 11.04 [-13.08;35.16]   | 29.34 [-36.46;95.15]    | 65.4%    | 0.089                      |
| Rani 0.5q4 vs LP-><br>Afli 2q8           | VIEW 1<br>VIEW 2      | 11.26 [-1.67; 24.18]   | 11.26 [-1.67; 24.18]    | 0.0%     | 0.940                      |
| Rani 0.5q4 vs. Afli<br>2q4               | VIEW 1<br>VIEW 2      | 7.41 [-5.22; 20.04]    | 8.21 [-9.95; 26.38]     | 50.6%    | 0.155                      |
| LP -> Afli 2q8 vs.<br>Afli 2q4           | VIEW 1<br>VIEW 2      | -3.66 [-16.16; 8.85]   | -2.83 [-22; 16.34]      | 56.7%    | 0.129                      |
| LP -> Bro 6q12/q8<br>vs. LP -> Afli 2q8  | HARRIER<br>HAWK       | -39.28 [-52.55;-26.02] | -39.41 [-59.79;-19.03]  | 57.6%    | 0.125                      |
| LP -> Afli 2q8 vs.<br>LP -> Fari 6q8-q16 | TENAYA<br>LUCERNE     | 12.21 [5.68;18.75]     | 12.21 [5.68;18.75]      | 0.00%    | 0.799                      |

*Table S 7. Summary of direct comparison results for mean change in retinal thickness at 2 years*

| Comparison                        | Included trials | Mean diff (95% CI)      |                         | I-square | P-value<br>Cochran test |
|-----------------------------------|-----------------|-------------------------|-------------------------|----------|-------------------------|
|                                   |                 | Fixed-effects model     | Random-effects model    |          |                         |
| LP -> Bro 6q12/q8 vs. Aflibercept | HARRIER<br>HAWK | -34.69 [-48.64; -20.74] | -34.60 [-50.77; -18.44] | 25.4%    | 0.247                   |

Table S 8. Summary of direct comparison results for odds of losing at least 15 letters at 1 year

| Comparison                             | Trials                 | OR [95% CI]         |                      | I-square | P-value of the Cochran test |
|----------------------------------------|------------------------|---------------------|----------------------|----------|-----------------------------|
|                                        |                        | Fixed-effects model | Random-effects model |          |                             |
| LP -> Afli 2q8 vs. Rani 0.5q4          | VIEW 1<br>VIEW 2       | 0.83 [0.50; 1.38]   | 0.83 [0.50; 1.38]    | 0.0%     | 0.826                       |
| Afli 2q4 vs. Rani 0.5q4                | VIEW 1<br>VIEW 2       | 0.91 [0.55; 1.50]   | 0.91 [0.55; 1.50]    | 0.0%     | 0.530                       |
| LP -> Afli 2q8 vs. Afli 2q4            | VIEW 1<br>VIEW 2       | 1.10 [0.66; 1.84]   | 1.10 [0.66; 1.84]    | 0.0%     | 0.698                       |
| LP -> Bro 6q12/q8 vs. LP -> Afli 2q8   | HARRIER<br>HAWK        | 0.97 [0.61; 1.55]   | 0.97 [0.61; 1.55]    | 0.00%    | 0.390                       |
| LP -> Rani 0.5q8 vs. LP -> Rani 0.5PRN | RABIMO<br>Lopez 2020   | 1.57 [0.45;5.54]    | 1.57 [0.44;5.54]     | 0.00%    | 0.786                       |
| LP -> Rani 0.5TREX vs. Rani 0.5q4      | TREND<br>CAN-<br>TREAT | 1.12 [0.63;1.98]    | 1.06 [0.39;2.85]     | 64.04%   | 0.095                       |
| LP -> Afli 2q8 vs. LP -> Fari 6q8-q16  | TENAYA<br>LUCERNE      | 0.93 [0.57;1.55]    | 0.93 [0.53;1.62]     | 16.21%   | 0.275                       |

Table S 9. Summary of direct comparison results for odds of losing at least 15 letters at 2 years

| Comparison                           | Included trials    | OR (95% CI)         |                      | I-square | P-value Cochran test |
|--------------------------------------|--------------------|---------------------|----------------------|----------|----------------------|
|                                      |                    | Fixed-effects model | Random-effects model |          |                      |
| LP -> Bro 6q12/q8 vs. LP -> Afli 2q8 | HARRIER HAWK       | 1.00 [0.68; 1.47]   | 1.00 [0.68; 1.47]    | 0.0%     | 0.686                |
| LP -> Rani 0.5TREX vs. Rani 0.5q4    | TREX-AMD CAN-TREAT | 1.34 [0.67;2.68]    | 1.34 [0.54;3.34]     | 7.7%     | 0.298                |

Table S 10. Summary of direct comparison results for odds of gaining at least 15 letters at 1 year

| Comparison                                   | Trials                         | OR [95% CI]         |                      | I-square | P-value of the Cochran test |
|----------------------------------------------|--------------------------------|---------------------|----------------------|----------|-----------------------------|
|                                              |                                | Fixed-effects model | Random-effects model |          |                             |
| LP -> Rani<br>0.5TREX vs Rani<br>0.5q4       | TREND<br>TREX-AMD<br>CAN-TREAT | 1.18 [0.90; 1.54]   | 1.18 [0.9;1.54]      | 0.0%     | 0.489                       |
| LP -> Afli 2q8 vs.<br>Rani 0.5q4             | VIEW 1<br>VIEW 2               | 0.93 [0.73; 1.19]   | 0.93 [0.73; 1.19]    | 0.0%     | 0.676                       |
| Afli 2q4 vs. Rani<br>0.5q4                   | VIEW 1<br>VIEW 2               | 1.05 [0.82; 1.33]   | 1.04 [0.64; 1.71]    | 76.3%    | 0.040                       |
| LP -> Afli 2q8 vs.<br>Afli 2q4               | VIEW 1<br>VIEW 2               | 1.12 [0.88;1.43]    | 1.12 [0.75; 1.65]    | 62.3%    | 0.103                       |
| LP -> Bro 6q12/q8<br>vs. LP -> Afli 2q8      | HARRIER<br>HAWK                | 1.19 [0.95; 1.49]   | 1.19 [0.79; 1.80]    | 69.7%    | 0.069                       |
| LP -> Rani 0.5q8<br>vs. LP -> Rani<br>0.5PRN | RABIMO<br>Lopez 2020           | 0.68 [0.39;1.18]    | 0.68 [0.39;1.18]     | 0.00%    | 0.924                       |

*Table S 11. Summary of direct comparison results for odds of gaining at least 15 letters at 2 years*

| Comparison                           | Included trials               | OR (95% CI)         |                      | I-square | P-value Cochran test |
|--------------------------------------|-------------------------------|---------------------|----------------------|----------|----------------------|
|                                      |                               | Fixed-effects model | Random-effects model |          |                      |
| LP -> Bro 6q12/q8 vs. LP -> Afli 2q8 | HARRIER<br>HAWK               | 1.11 [0.89; 1.39]   | 1.12 [0.73; 1.71]    | 72.4%    | 0.057                |
| LP -> Rani 0.5TREX vs. Rani 0.5q4    | TREX-<br>AMD<br>CAN-<br>TREAT | 1.19 [0.81;1.75]    | 1.19 [0.81;1.75]     | 0.0%     | 0.561                |



Table S 12. Summary of direct comparison results for discontinuation at 1 year

| Comparison                            | Trials                         | OR [95% CI]         |                      | I-square | P-value of the Cochran test |
|---------------------------------------|--------------------------------|---------------------|----------------------|----------|-----------------------------|
|                                       |                                | Fixed-effects model | Random-effects model |          |                             |
| LP -> Rani 0.5TREX vs. Rani 0.5q4     | TREND<br>TREX-AMD<br>CAN-TREAT | 0.79 [0.54;1.14]    | 0.84 [0.39;1.81]     | 64.48%   | 0.060                       |
| LP -> Afli 2q8 vs. Rani 0.5q4         | VIEW 1<br>VIEW 2               | 1.04 [0.72; 1.51]   | 1.04 [0.72; 1.51]    | 0.00%    | 0.668                       |
| Afli 2q4 vs. Rani 0.5q4               | VIEW 1<br>VIEW 2               | 0.86 [0.58; 1.27]   | 0.82 [0.44; 1.54]    | 59.14%   | 0.118                       |
| Afli 2q4 vs. LP -> Afli 2q8           | VIEW 1<br>VIEW 2               | 0.83 [0.56; 1.23]   | 0.78 [0.35; 1.72]    | 74.53%   | 0.048 <sup>+</sup>          |
| LP -> Bro 6q12/q8 vs. LP -> Afli 2q8  | HARRIER<br>HAWK                | 0.87 [0.61; 1.25]   | 0.87 [0.61; 1.25]    | 0.00%    | 0.447                       |
| LP -> Afli 2q8 vs. LP -> Fari 6q8-q16 | TENAYA<br>LUCERNE              | 0.83 [0.53;1.31]    | 0.83 [0.37;1.86]     | 67.53%   | 0.079                       |

Table S 13. Summary of direct comparison results for discontinuation at 2 years

| Comparison                                 | Included trials | OR (95% CI)            |                      | I-square | P-value<br>Cochran<br>test |
|--------------------------------------------|-----------------|------------------------|----------------------|----------|----------------------------|
|                                            |                 | Fixed-effects<br>model | Random-effects model |          |                            |
| LP -> Bro<br>6q12/q8<br>vs. LP -> Afli 2q8 | HARRIER<br>HAWK | 0.81 [0.61; 1.07]      | 0.81 [0.61; 1.07]    | 0.0%     | 0.954                      |

Adverse events results – pooled treatment effects

Table S 14. Pooled proportion of patients with serious adverse events by treatment molecule at 1 and 2 years

| <b>Molecule</b>                           | <b>Number of Trials</b> | <b>Average proportion of patients with serious adverse event</b> | <b>Standard Error</b> | <b>Cochran Q Statistic</b> | <b>P-value of Cochran Q</b> |
|-------------------------------------------|-------------------------|------------------------------------------------------------------|-----------------------|----------------------------|-----------------------------|
| <b>Cataract - 1 year</b>                  |                         |                                                                  |                       |                            |                             |
| Aflibercept                               | 6                       | 0.0030                                                           | 0.0001                | 2.0600                     | 0.8408                      |
| Brolucizumab                              | 2                       | 0.0030                                                           | 0.0001                | 0.0000                     | 1.0000                      |
| Ranibizumab                               | 6                       | 0.0038                                                           | 0.0015                | 85.8176                    | 0.0000                      |
| Faricimab                                 | 0                       |                                                                  | Not reported          |                            |                             |
| Sham                                      | 0                       |                                                                  | Not reported          |                            |                             |
| <b>Cataract - 2 years</b>                 |                         |                                                                  |                       |                            |                             |
| Aflibercept                               | 4                       | 0.0059                                                           | 0.0006                | 16.9328                    | 0.0020                      |
| Brolucizumab                              | 2                       | 0.0030                                                           | 0.0001                | 0.0000                     | 1.0000                      |
| Ranibizumab                               | 1                       | 0.0045                                                           | 0.0025                | 72.4200                    | 0.0000                      |
| Faricimab                                 | 0                       |                                                                  | Not reported          |                            |                             |
| Sham                                      | 0                       |                                                                  | Not reported          |                            |                             |
| <b>Endophthalmitis – 1 year</b>           |                         |                                                                  |                       |                            |                             |
| Aflibercept                               | 6                       | 0.0031                                                           | 0.0023                | 58.4628                    | 0.0000                      |
| Brolucizumab                              | 2                       | 0.0045                                                           | 0.0015                | 73.1813                    | 0.0000                      |
| Ranibizumab                               | 15                      | 0.0050                                                           | 0.0012                | 255.7260                   | 0.0000                      |
| Faricimab                                 | 0                       |                                                                  | Not reported          |                            |                             |
| Sham                                      | 1                       | 0.0000                                                           | 0.0000                | .                          | .                           |
| <b>Endophthalmitis – 2 years</b>          |                         |                                                                  |                       |                            |                             |
| Aflibercept                               | 5                       | 0.0054                                                           | 0.0015                | 237.6613                   | 0.0000                      |
| Brolucizumab                              | 2                       | 0.0055                                                           | 0.0025                | 125.5503                   | 0.0000                      |
| Ranibizumab                               | 7                       | 0.0094                                                           | 0.0020                | 86.5610                    | 0.0000                      |
| Faricimab                                 | 0                       |                                                                  | Not reported          |                            |                             |
| Sham                                      | 1                       | 0.0000                                                           | 0.0000                | .                          | .                           |
| <b>Intraocular inflammation – 1 year</b>  |                         |                                                                  |                       |                            |                             |
| Aflibercept                               | 0                       |                                                                  | Not reported          |                            |                             |
| Brolucizumab                              | 0                       |                                                                  | Not reported          |                            |                             |
| Ranibizumab                               | 5                       | 0.0000                                                           | 0.0000                | 0.0000                     | 1.0000                      |
| Faricimab                                 | 0                       |                                                                  | Not reported          |                            |                             |
| Sham                                      | 1                       | 0.0000                                                           | 0.0000                | 0.0000                     | .                           |
| <b>Intraocular inflammation – 2 years</b> |                         |                                                                  |                       |                            |                             |
| Aflibercept                               | 2                       | 0.0000                                                           | 0.0000                | 0.0000                     | 0.0000                      |
| Brolucizumab                              | 2                       | 0.0095                                                           | 0.0015                | 18.1886                    | 0.0000                      |
| Ranibizumab                               | 2                       | 0.0000                                                           | 0.0000                | 0.0000                     | 0.0000                      |
| Faricimab                                 | 0                       |                                                                  | Not reported          |                            |                             |
| Sham                                      | 0                       |                                                                  | Not reported          |                            |                             |
| <b>Retinal detachment – 1 year</b>        |                         |                                                                  |                       |                            |                             |

|                                                  |    |        |              |          |        |
|--------------------------------------------------|----|--------|--------------|----------|--------|
| Aflibercept                                      | 6  | 0.0030 | 0.0002       | 2.0201   | 0.8464 |
| Brolucizumab                                     | 2  | 0.0030 | 0.0002       | 0.7402   | 0.3896 |
| Ranibizumab                                      | 9  | 0.0030 | 0.0001       | 2.4175   | 0.9655 |
| Faricimab                                        | 0  |        | Not reported |          |        |
| Sham                                             | 1  | 0.0000 | 0.0000       | .        | .      |
| <b>Retinal detachment – 2 years</b>              |    |        |              |          |        |
| Aflibercept                                      | 5  | 0.0038 | 0.0006       | 155.0532 | 0.0000 |
| Brolucizumab                                     | 2  | 0.0030 | 0.0001       | 0.0000   | 1.0000 |
| Ranibizumab                                      | 5  | 0.0049 | 0.0003       | 4.0286   | 0.4022 |
| Faricimab                                        | 0  |        | Not reported |          |        |
| Sham                                             | 1  | 0.0040 | 0.0003       | .        | .      |
| <b>Retinal pigment epithelial tear – 1 year</b>  |    |        |              |          |        |
| Aflibercept                                      | 6  | 0.0030 | 0.0001       | 2.0893   | 0.8367 |
| Brolucizumab                                     | 2  | 0.0040 | 0.0010       | 43.5997  | 0.0000 |
| Ranibizumab                                      | 6  | 0.0110 | 0.0048       | 35.9310  | 0.0000 |
| Faricimab                                        | 0  |        | Not reported |          |        |
| Sham                                             | 0  |        | Not reported |          |        |
| <b>Retinal pigment epithelial tear – 2 years</b> |    |        |              |          |        |
| Aflibercept                                      | 4  | 0.0024 | 0.0015       | 19.1822  | 0.0003 |
| Brolucizumab                                     | 2  | 0.0040 | 0.0010       | 43.5997  | 0.0000 |
| Ranibizumab                                      | 1  | 0.0020 | 0.0001       | 0.0000   | .      |
| <b>Faricimab</b>                                 | 0  |        | Not reported |          |        |
| <b>Sham</b>                                      | 0  |        | Not reported |          |        |
| <b>Retinal tear – 1 year</b>                     |    |        |              |          |        |
| Aflibercept                                      | 2  | 0.0000 | 0.0000       | 0.0000   | 1.0000 |
| <b>Brolucizumab</b>                              | 0  |        | Not reported |          |        |
| Ranibizumab                                      | 7  | 0.0030 | 0.0001       | 1.6657   | 0.9477 |
| <b>Faricimab</b>                                 | 0  |        | Not reported |          |        |
| <b>Sham</b>                                      | 0  |        | Not reported |          |        |
| <b>Retinal tear – 2 years</b>                    |    |        |              |          |        |
| Aflibercept                                      | 1  | 0.0030 | 0.0002       | 0.0000   | .      |
| Brolucizumab                                     | 1  | 0.0050 | 0.0003       | 0.0000   | .      |
| Ranibizumab                                      | 3  | 0.0040 | 0.0003       | 1.4049   | 0.4954 |
| <b>Faricimab</b>                                 | 0  |        | Not reported |          |        |
| Sham                                             | 1  | 0.0000 | 0.0000       | 0.0000   | .      |
| <b>Stroke – 1 year</b>                           |    |        |              |          |        |
| Aflibercept                                      | 8  | 0.0045 | 0.0006       | 295.5113 | 0.0000 |
| Brolucizumab                                     | 2  | 0.0063 | 0.0048       | 23.4139  | 0.0000 |
| Ranibizumab                                      | 13 | 0.0058 | 0.0009       | 288.3556 | 0.0000 |
| Faricimab                                        | 2  | 0.0042 | 0.0022       | 4.4246   | 0.0354 |
| Sham                                             | 1  | 0.0079 | 0.0112       | 0.0000   | .      |
| <b>Stroke – 2 years</b>                          |    |        |              |          |        |
| Aflibercept                                      | 4  | 0.0094 | 0.0009       | 64.7270  | 0.0000 |
| Brolucizumab                                     | 2  | 0.0063 | 0.0048       | 23.4139  | 0.0000 |

|             |   |        |              |          |        |
|-------------|---|--------|--------------|----------|--------|
| Ranibizumab | 4 | 0.0104 | 0.0018       | 257.7988 | 0.0000 |
| Faricimab   | 0 |        | Not reported |          |        |
| Sham        | 1 | 0.0080 | 0.0005       | 0.0000   | .      |

Inclusion of unlicensed bevacizumab

Table S 15. Details of trials assessing unlicensed bevacizumab

| <b>Trial #</b> | <b>Author, year</b>          | <b>Trial name</b> | <b>Time of assessment (months)</b> | <b>Previous anti-VEGF therapy</b> | <b>Intervention</b>                               | <b>Comparator</b>          |
|----------------|------------------------------|-------------------|------------------------------------|-----------------------------------|---------------------------------------------------|----------------------------|
| 1              | Martin 2011 /<br>Martin 2012 | CATT              | 12 / 24                            | Treatment-naive                   | Rani 0.5q4<br>Rani 0.5PRN                         | Bev 1.25q4<br>Bev 1.25 PRN |
| 2              | Berg 2015/2016               | LUCAS             | 12 / 24                            | Treatment-naive                   | Bev<br>1.25TREX                                   | LP -> Rani<br>0.5TREX      |
| 3              | Kodjikian 2013               | GEFAL             | 12                                 | Treatment-naive                   | LP -> Bev<br>1.25PRN                              | LP -> Rani<br>0.5PRN       |
| 4              | Krebs 2013                   | MANTA             | 12                                 | Treatment-naive                   | LP -> Bev<br>1.25PRN                              | LP -> Rani<br>0.5PRN       |
| 5              | Li 2012                      | NATTB             | 11                                 | Treatment-naive                   | Bev 1.25q6                                        | LP (q6) -> Bev<br>1.25q12  |
| 6              | Lushchik 2013                | NR                | 12                                 | Treatment-naive                   | Bev 1.25q4                                        | Bev 1.25q6<br>Bev 1.25q8   |
| 7              | Menon 2013                   | BEMOC             | 12                                 | Treatment-naive                   | LP (q6) -> Bev<br>1.25PRN                         | Bev 1.25PRN                |
| 8              | Nunes 2019                   | NR                | 12                                 | Treatment-naive                   | LP -> Bev<br>1.25PRN<br>LP (q2) -> Bev<br>1.25PRN | LP -> Rani<br>0.5PRN       |
| 9              | Schauwvlieghe<br>2016        | BRAMD             | 12                                 | Previously treated                | Bev 1.25q4                                        | Rani 0.5q4                 |
| 10             | Scholler 2014                | NR                | 12                                 | Treatment-naive                   | LP -> Rani<br>0.5PRN                              | LP -> Bev<br>1.25PRN       |

Figure S 10. Network for mean change in BCVA at 1 year with unlicensed bevacizumab

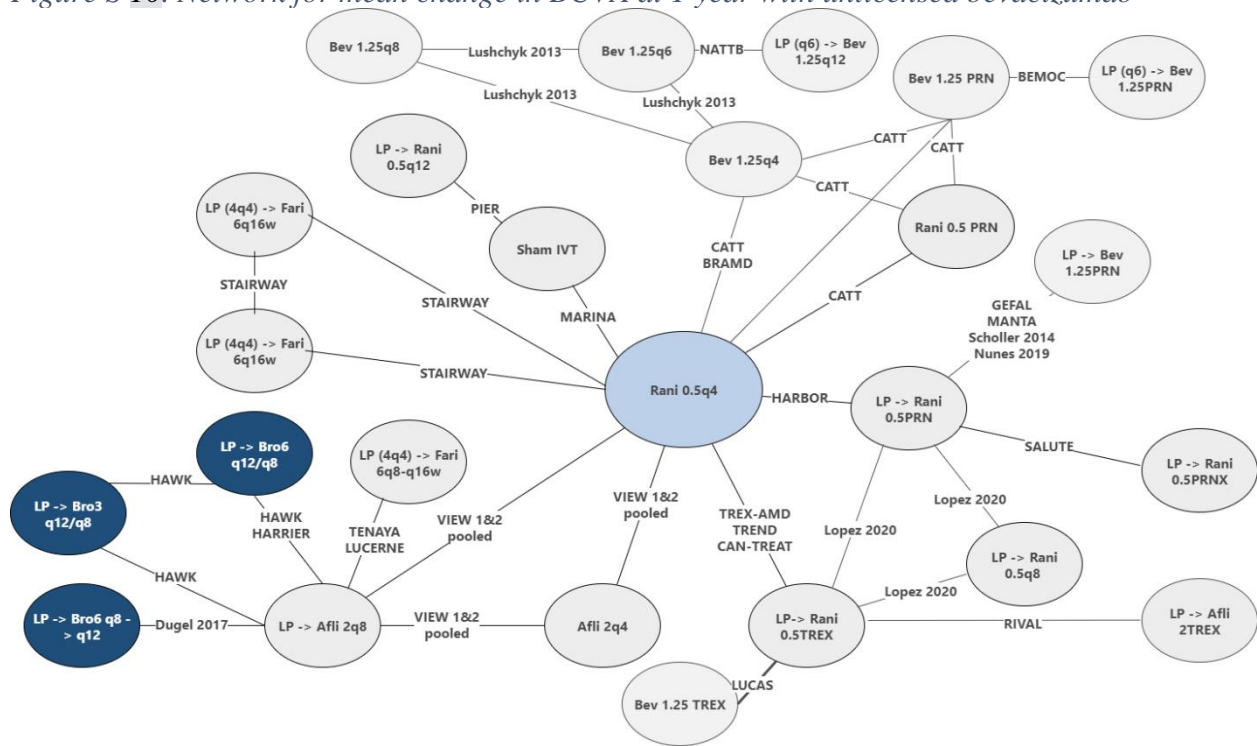

Figure S 11. Network for mean change in BCVA at 2 years with unlicensed bevacizumab

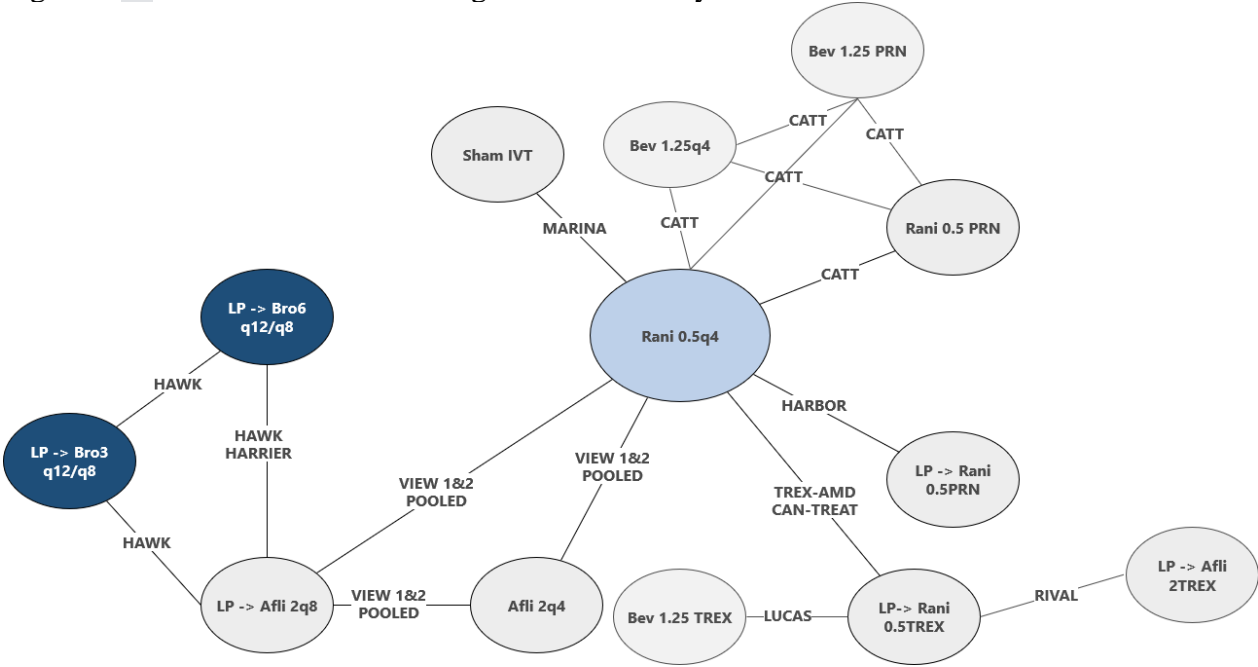



Figure S 12. Network for mean change in retinal thickness at 1 year with unlicensed bevacizumab

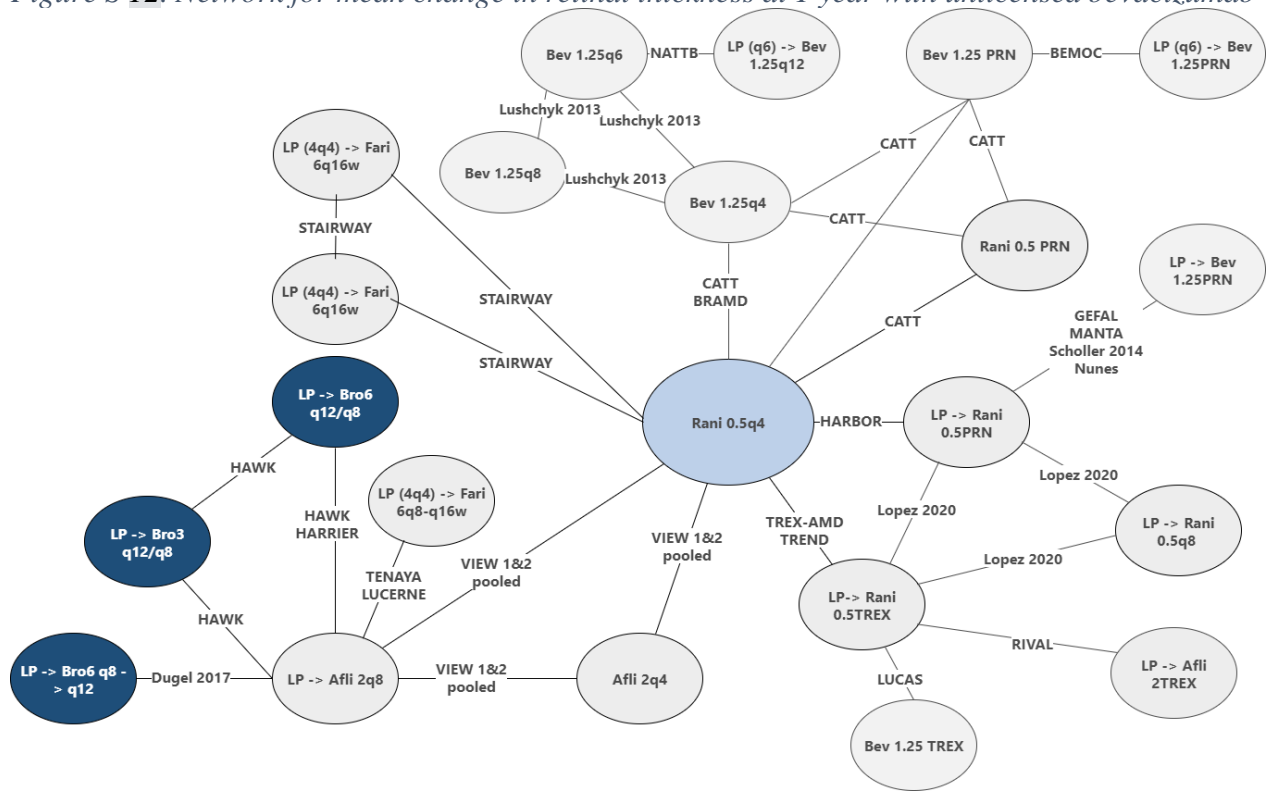

Figure S 13. Network for mean change in retinal thickness at 2 years with unlicensed bevacizumab

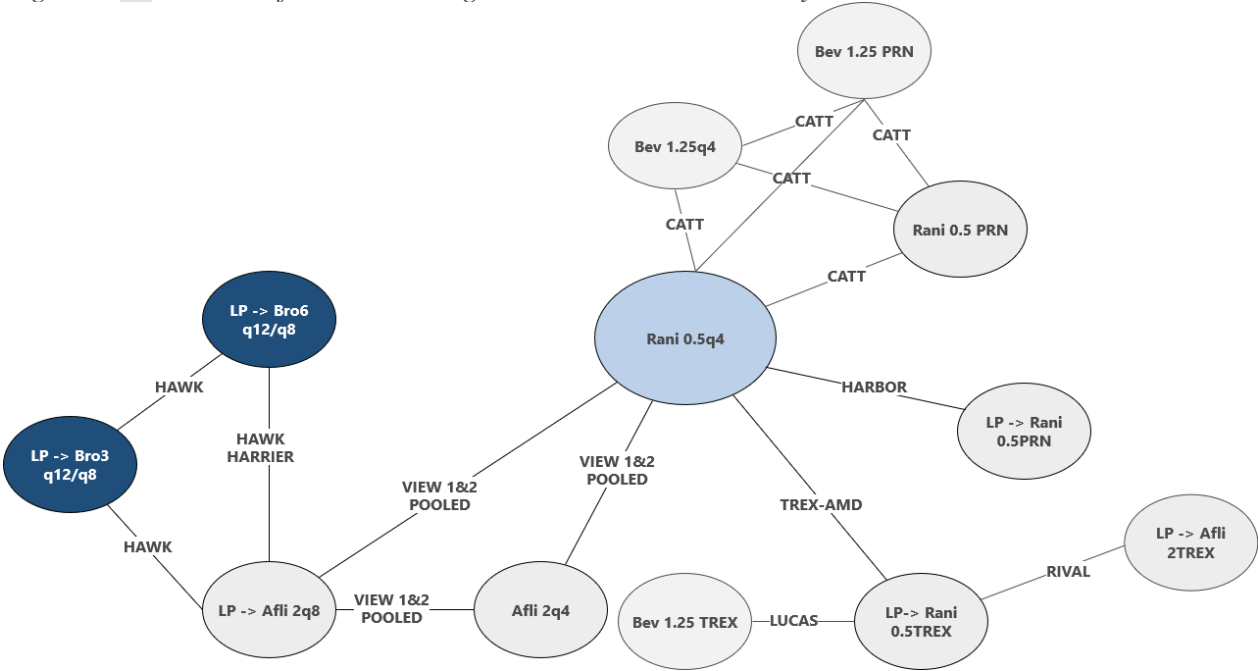

Figure S 14. Network for patients losing at least 15 letters at 1 year with unlicensed bevacizumab

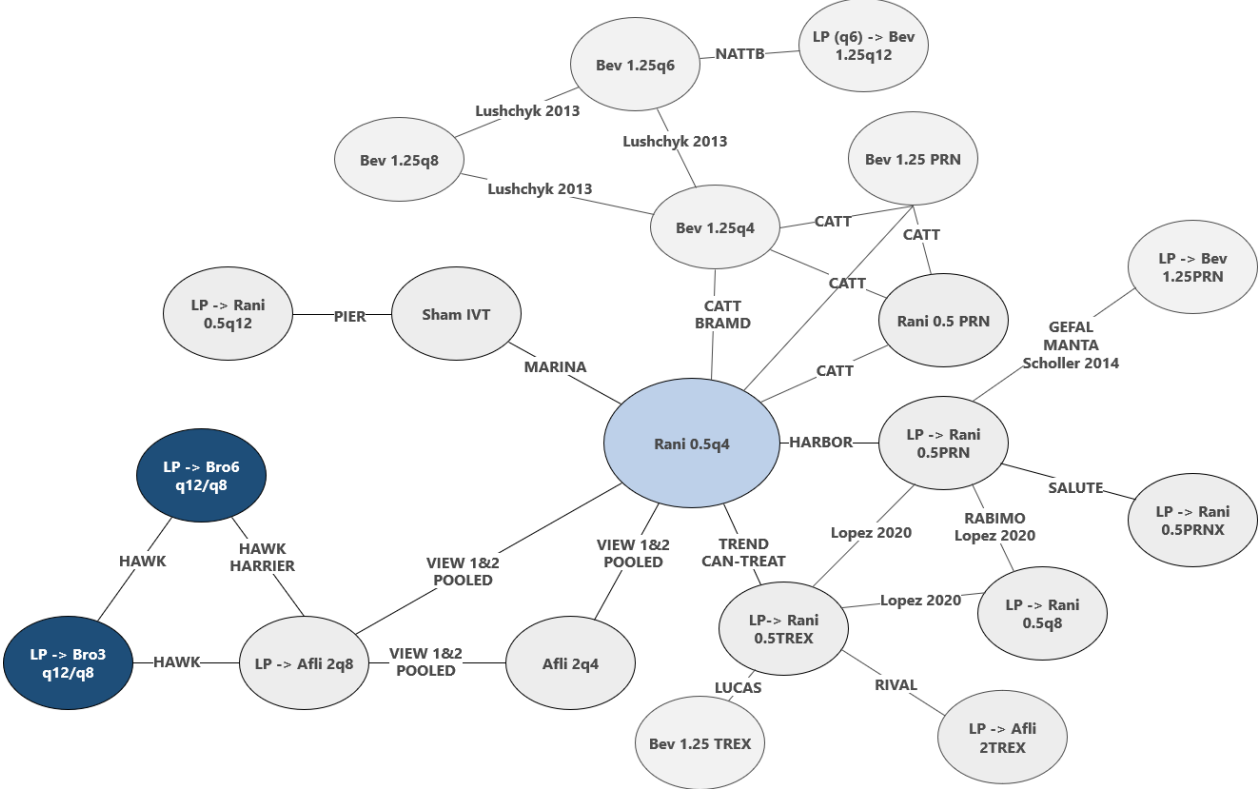

Figure S 15. Network for patients losing at least 15 letters at 2 years with unlicensed bevacizumab

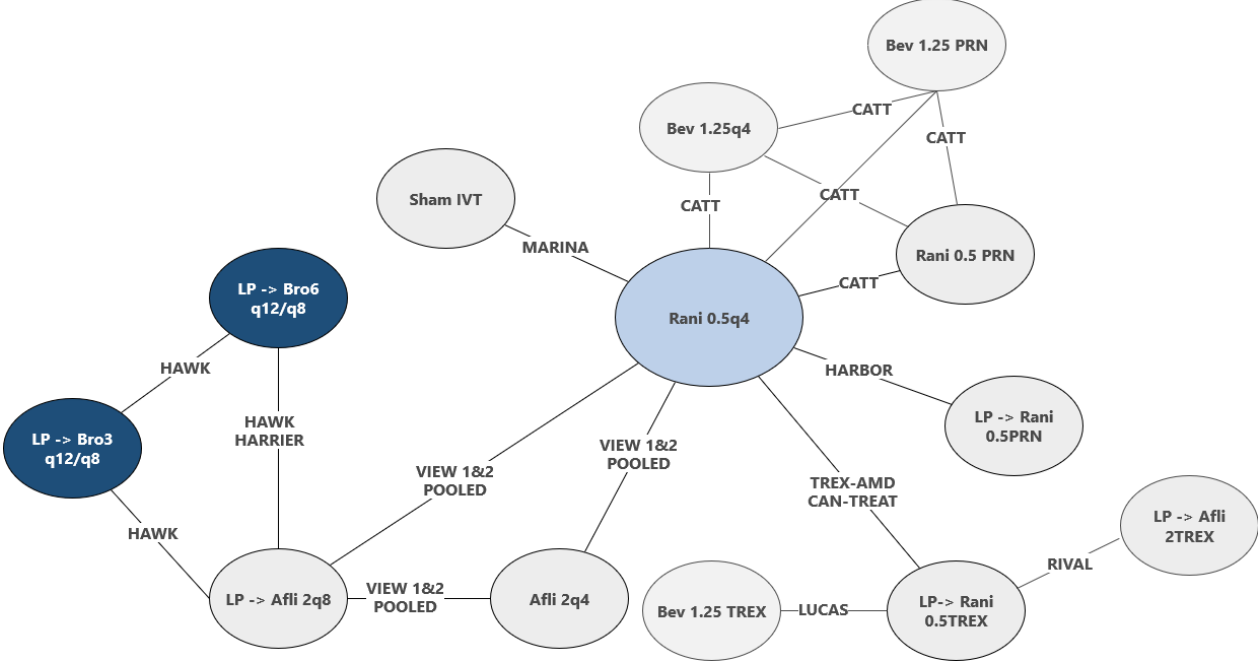

Figure S 16. Network for patients gaining at least 15 letters at 1 year with unlicensed bevacizumab

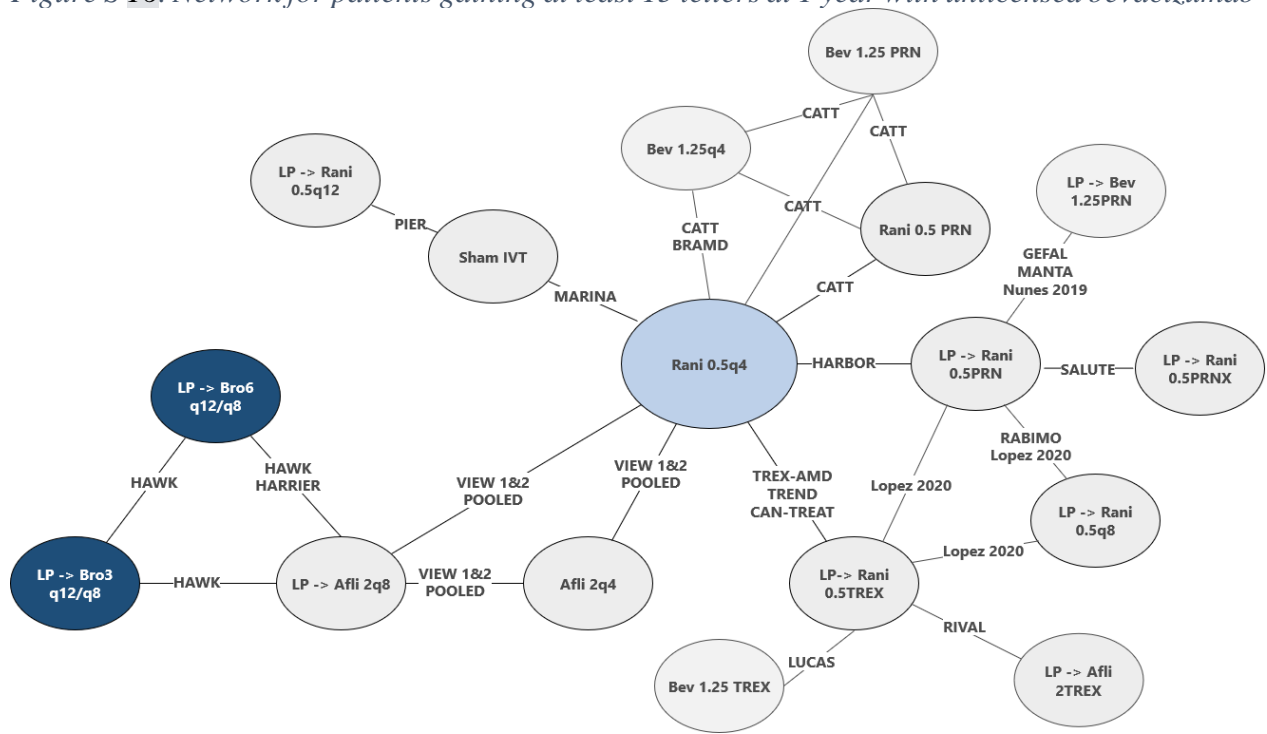

Figure S 17. Network for patients gaining at least 15 letters at 2 years with unlicensed bevacizumab

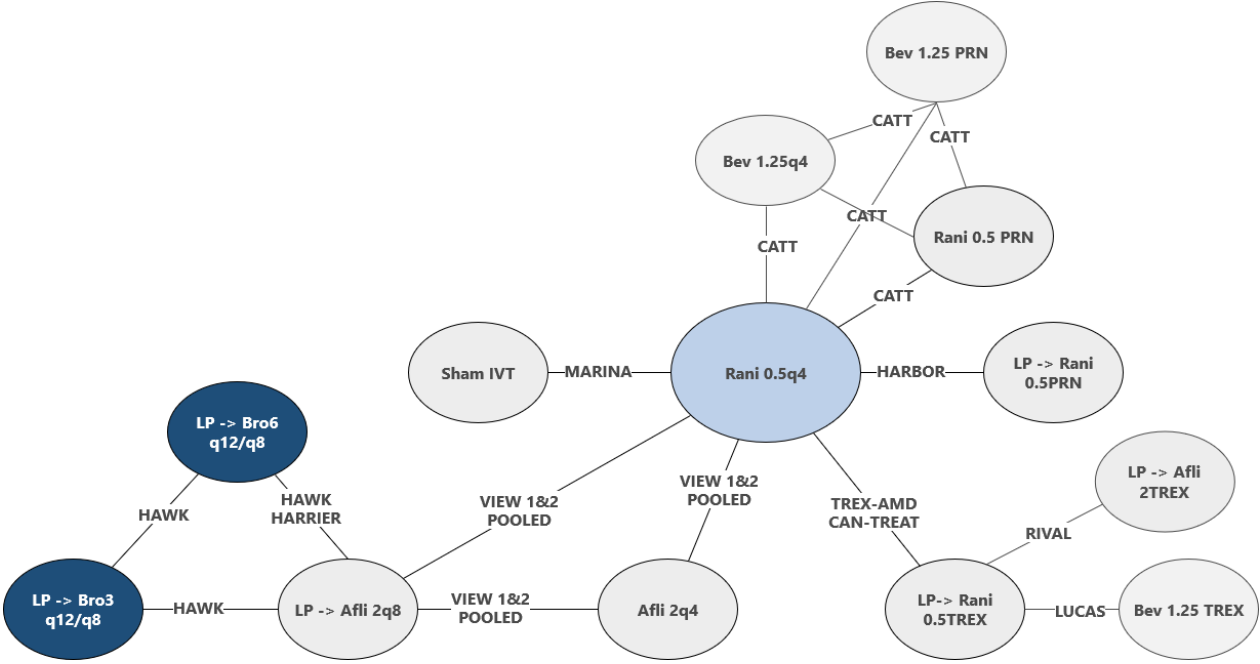

Figure S 18. Network for discontinuation at 1 year with unlicensed bevacizumab

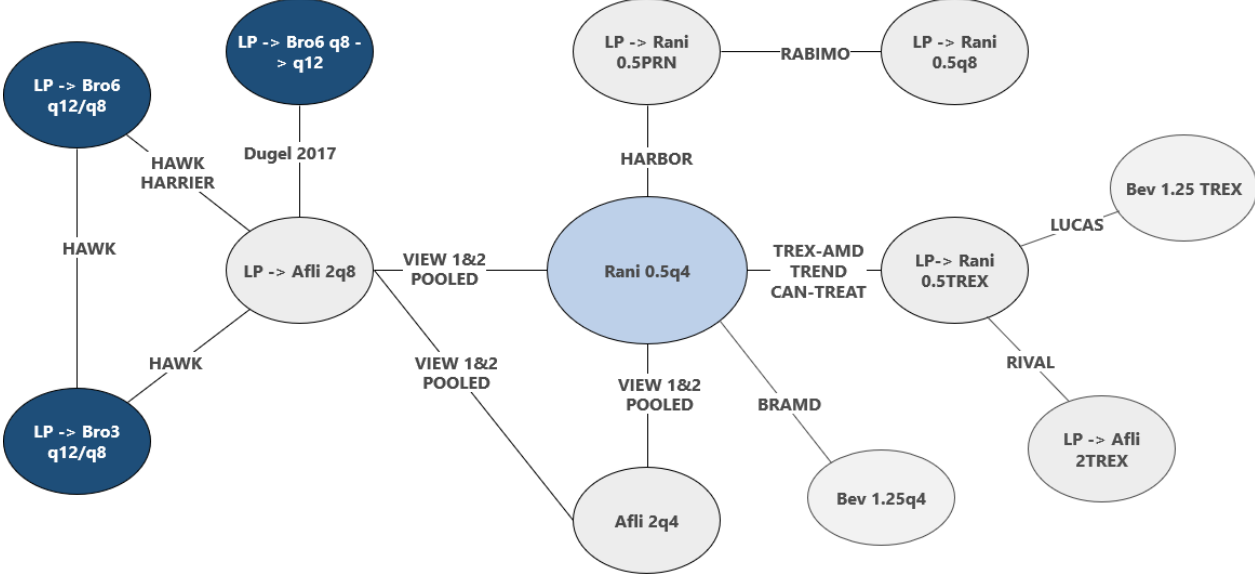

Figure S 19. Network for discontinuation at 2 years with unlicensed bevacizumab

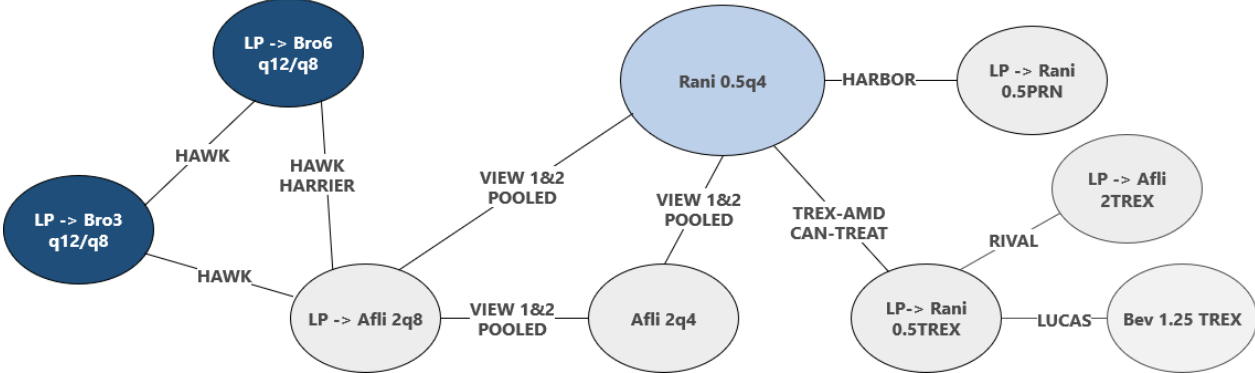



*Table S 16. Summary of additional direct comparison results for mean change in BCVA at 1 year*

| Comparison                              | Trials                                        | Mean diff [95% CI]  |                      | I-square | P-value of the Cochran test |
|-----------------------------------------|-----------------------------------------------|---------------------|----------------------|----------|-----------------------------|
|                                         |                                               | Fixed-effects model | Random-effects model |          |                             |
| LP -> Bev 1.25PRN vs. LP -> Rani 0.5PRN | GEFAL<br>MANTA<br>Scholler 2014<br>Nunes 2019 | 1.34 [-1.22, 3.9]   | 1.35 [-1.97, 4.67]   | 29.4%    | 0.236                       |
| Bev 1.25q4 vs. Rani 0.5q4               | BRAMD<br>CATT                                 | -0.85 [-2.71, 1.02] | -0.85 [-2.71, 1.02]  | 0%       | 0.674                       |

Table S 17. Summary of additional direct comparison results for mean change in retinal thickness at 1 year

| Comparison                              | Trials                                        | Mean diff [95% CI]   |                      | I-square | P-value of the Cochran test |
|-----------------------------------------|-----------------------------------------------|----------------------|----------------------|----------|-----------------------------|
|                                         |                                               | Fixed-effects model  | Random-effects model |          |                             |
| LP -> Bev 1.25PRN vs. LP -> Rani 0.5PRN | GEFAL<br>MANTA<br>Scholler 2014<br>Nunes 2019 | 14.4 [-2.91, 31.71]  | 15.76 [-4.23, 35.75] | 14.38%   | 0.320                       |
| Bev 1.25q4 vs. Rani 0.5q4               | BRAMD<br>CATT                                 | 17.99 [-2.01, 37.99] | 18.48 [-5.94, 42.9]  | 32.37%   | 0.224                       |

Table S 18. Summary of additional direct comparison results for patients losing at least 15 letters at 1 year

| Comparison                              | Trials                             | Mean diff [95% CI]  |                      | I-square | P-value of the Cochran test |
|-----------------------------------------|------------------------------------|---------------------|----------------------|----------|-----------------------------|
|                                         |                                    | Fixed-effects model | Random-effects model |          |                             |
| LP -> Bev 1.25PRN vs. LP -> Rani 0.5PRN | GEFAL<br>MANTA<br>Scholler<br>2014 | 0.88 [0.51, 1.51]   | 0.88 [0.51, 1.51]    | 0.00%    | 0.994                       |
| Bev 1.25q4 vs. Rani 0.5q4               | BRAMD<br>CATT                      | 1.53 [0.89, 2.63]   | 1.58 [0.7, 3.57]     | 53.45%   | 0.143                       |

Table S 19. Summary of additional direct comparison results for patients gaining at least 15 letters at 1 year

| Comparison                              | Trials                          | Mean diff [95% CI]  |                      | I-square | P-value of the Cochran test |
|-----------------------------------------|---------------------------------|---------------------|----------------------|----------|-----------------------------|
|                                         |                                 | Fixed-effects model | Random-effects model |          |                             |
| LP -> Bev 1.25PRN vs. LP -> Rani 0.5PRN | GEFAL<br>MANTA<br>Nunes<br>2019 | 0.96 [0.68, 1.37]   | 0.96 [0.66, 1.40]    | 6.59%    | 0.343                       |
| Bev 1.25q4 vs. Rani 0.5q4               | BRAMD<br>CATT                   | 1.00 [0.75, 1.35]   | 1.04 [0.69, 1.55]    | 40.17%   | 0.196                       |

Table S 20. Cumulative surface under the cumulative ranking curves (SUCRA), comparison of LP -> Bro 6q12/q8 versus of each comparator and probabilities for LP -> Bro 6q12/q8 to perform better than each comparator for all outcomes at 1 and 2 years with unlicensed bevacizumab

| Treatment                  | SUCRA | Comparison* of LP -> Bro 6q12/q8 vs each comparator [95% CrI] | Probability for LP -> Bro 6q12/q8 to perform better than each comparator | SUCRA          | Comparison* of LP -> Bro 6q12/q8 vs each comparator [95% CrI] | Probability for LP -> Bro 6q12/q8 to perform better than each comparator |
|----------------------------|-------|---------------------------------------------------------------|--------------------------------------------------------------------------|----------------|---------------------------------------------------------------|--------------------------------------------------------------------------|
| <b>Mean change in BCVA</b> |       | <b>1 year</b>                                                 |                                                                          | <b>2 years</b> |                                                               |                                                                          |
| Rani 0.5q4                 | 64%   | -0.76 [-2.74,1.26]                                            | 23%                                                                      | 69%            | -0.27 [-2.45, 1.9]                                            | 40%                                                                      |
| Rani 0.5PRN                | 33%   | 1.08 [-1.84,3.99]                                             | 77%                                                                      | 32%            | 1.85 [-2.06, 5.71]                                            | 83%                                                                      |
| Bev 1.25q4                 | 48%   | 0.08 [-2.68,2.80]                                             | 52%                                                                      | 50%            | 0.72 [-3.59, 5.08]                                            | 63%                                                                      |
| Bev 1.25PRN                | 22%   | 1.98 [-1.12,5.05]                                             | 90%                                                                      | 14%            | 3.54 [-0.55, 7.63]                                            | 95%                                                                      |
| LP -> Afli 2q8             | 58%   | -0.44 [-1.74,0.85]                                            | 25%                                                                      | 61%            | 0.02 [-1.45, 1.50]                                            | 51%                                                                      |
| LP -> Bro 6q8 -> q12       | 43%   | 0.75 [-5.63,7.10]                                             | 59%                                                                      | -              | -                                                             | -                                                                        |
| LP -> Rani 0.5PRN          | 38%   | 0.63 [-2.16,3.43]                                             | 67%                                                                      | 43%            | 0.92 [-2.35, 4.22]                                            | 71%                                                                      |
| LP -> Bro 6q12/q8          | 49%   | -                                                             | -                                                                        | 61%            | -                                                             | -                                                                        |
| LP -> Bro 3q12/q8          | 42%   | 0.38 [-1.41,2.18]                                             | 66%                                                                      | 61%            | 0.01 [-2.00, 2.04]                                            | 50%                                                                      |
| Sham IVT                   | 0%    | 16.84 [13.33,20.35]                                           | 100%                                                                     | 0%             | 21.23 [17.45, 25.05]                                          | 100%                                                                     |
| LP -> Rani 0.5q12          | 44%   | 0.75 [-6.78,8.27]                                             | 58%                                                                      | -              | -                                                             | -                                                                        |
| LP -> Rani 0.5TREX         | 65%   | -0.83 [-3.23,1.55]                                            | 25%                                                                      | 77%            | -0.74 [-3.80, 2.27]                                           | 31%                                                                      |
| Afli 2q4                   | 74%   | -1.34 [-3.33,0.64]                                            | 9%                                                                       | 60%            | 0.02 [-2.15, 2.2]                                             | 51%                                                                      |
| LP -> Rani 0.5q8           | 55%   | -0.36 [-4.40,3.68]                                            | 43%                                                                      | -              | -                                                             | -                                                                        |
| LP -> Rani 0.5PRNX         | 79%   | -3.83 [-12.59,4.87]                                           | 20%                                                                      | -              | -                                                             | -                                                                        |
| LP -> Afli 2TREX           | 28%   | 1.57 [-1.81,4.97]                                             | 82%                                                                      | 39%            | 1.27 [-2.86, 5.35]                                            | 73%                                                                      |
| Bev 1.25q6                 | 46%   | 0.43 [-5.24,6.04]                                             | 56%                                                                      | -              | -                                                             | -                                                                        |
| LP -> Bev 1.25TREX         | 57%   | -0.57 [-6.08,4.94]                                            | 42%                                                                      | -              | -                                                             | -                                                                        |
| LP -> Bev 1.25PRN          | 61%   | -0.71 [-4.49,3.09]                                            | 36%                                                                      | -              | -                                                             | -                                                                        |
| LP (q26) -> Bev 1.25q12    | 27%   | 2.95 [-5.14,10.9]                                             | 76%                                                                      | -              | -                                                             | -                                                                        |
| LP (q26) -> Bev 1.25PRN    | 32%   | 1.87 [-4.32,7.99]                                             | 72%                                                                      | -              | -                                                             | -                                                                        |

|                                         |     |                          |      |     |                          |      |
|-----------------------------------------|-----|--------------------------|------|-----|--------------------------|------|
| Bev 1.25q8                              | 88% | -3.97 [-9.40,1.35]       | 7%   | -   | -                        | -    |
| LP (4q4) -> Fari 6q8-q16                | 62% | -0.65 [-2.50,1.23]       | 25%  | -   | -                        | -    |
| LP (4q4) -> Fari 6q12                   | 61% | -1.24 [-8.66,6.28]       | 37%  | -   | -                        | -    |
| LP (4q4) -> Fari 6q16                   | 73% | -2.53 [-9.68,4.61]       | 24%  | -   | -                        | -    |
| Bev 1.25 TREX                           | -   | -                        | -    | 82% | -1.54 [-6.05, 2.93]      | 25%  |
| <b>Mean change in retinal thickness</b> |     | <b>1 year</b>            |      |     | <b>2 years</b>           |      |
| Rani 0.5q4                              | 58% | -50.23 [-70.26,-29.77]   | 100% | 65% | -49.41 [-71.45, -27.99]  | 100% |
| LP -> Afli 2q8                          | 71% | -39.61 [-52.84,-26.39]   | 100% | 44% | -35.04 [-48.98, -21.14]  | 100% |
| LP -> Rani 0.5PRN                       | 42% | -61.92 [-90.77,-32.83]   | 100% | 75% | -58.25 [-90.78, -25.37]  | 100% |
| Afli 2q4                                | 70% | -40.29 [-60.64,-19.77]   | 100% | 50% | -39.53 [-61.25, -17.98]  | 100% |
| Rani 0.5PRN                             | 35% | -67.89 [-101.95,-33.89]  | 100% | 82% | -67.75 [-109.63, -26.06] | 100% |
| LP -> Bro 6q8 -> q12                    | 80% | -22.84 [-77.22,31.52]    | 80%  | -   | -                        | -    |
| LP -> Bro 6q12/q8                       | 98% | -                        | -    | 15% | -                        | -    |
| LP -> Bro 3q12/q8                       | 93% | -10.37 [-28.06,7.37]     | 87%  | 15% | 0.39 [-17.96, 18.85]     | 48%  |
| LP -> Rani 0.5TREX                      | 52% | -54.77 [-84.06,-25.62]   | 100% | 36% | -19.89 [-87.84, 48.04]   | 72%  |
| LP -> Rani 0.5q8                        | 31% | -71.54 [-109.18,-33.89]  | 100% | -   | -                        | -    |
| LP -> Afli 2TREX                        | 79% | -28.95 [-72.07,14.56]    | 90%  | 12% | 11.26 [-64.61, 87.31]    | 39%  |
| Bev 1.25q4                              | 39% | -64.38 [-92.70,-36.24]   | 100% | 67% | -54.02 [-102.49, -5.77]  | 99%  |
| Bev 1.25PRN                             | 20% | -82.78 [-116.69,-49.02]  | 100% | 93% | -80.57 [-122.98, -38.70] | 100% |
| Bev 1.25TREX                            | 42% | -61.97 [-97.59,-26.54]   | 100% | 46% | -28.27 [-100.15, 42.35]  | 78%  |
| LP -> Bev 1.25PRN                       | 27% | -74.31 [-108.21,-40.97]  | 100% | -   | -                        | -    |
| Bev 1.25q6                              | 24% | -81.4 [-125.45,-36.87]   | 100% | -   | -                        | -    |
| LP (q26) -> Bev 1.25q12                 | 3%  | -132.56 [-196.36,-69.46] | 100% | -   | -                        | -    |
| Bev 1.25q8                              | 28% | -76.72 [-121.91,-31.44]  | 100% | -   | -                        | -    |

|                               |     |                             |      |                |                   |      |
|-------------------------------|-----|-----------------------------|------|----------------|-------------------|------|
| LP (q26) -><br>Bev<br>1.25PRN | 5%  | -124.25<br>[-182.71,-65.51] | 100% | -              | -                 | -    |
| LP (4q4) -><br>Fari 6q8-q16   | 83% | -27.57<br>[-42.38,-12.8]    | 100% | -              | -                 | -    |
| LP (4q4) -><br>Fari 6q12      | 70% | -39.47<br>[-77.91,-1.09]    | 98%  | -              | -                 | -    |
| LP (4q4) -><br>Fari 6q16      | 50% | -55.32<br>[-92.47,-18.24]   | 100% | -              | -                 | -    |
| <b>Patients</b>               |     |                             |      |                |                   |      |
| <b>losing at least</b>        |     |                             |      |                |                   |      |
| <b>15 letters</b>             |     | <b>1 year</b>               |      | <b>2 years</b> |                   |      |
| Rani 0.5q4                    | 67% | 0.80 [0.39,1.65]            | 73%  | 63%            | 0.89 [0.50, 1.56] | 65%  |
| LP -> Rani<br>0.5PRN          | 25% | 0.31 [0.10,0.91]            | 98%  | 29%            | 0.54 [0.23, 1.28] | 92%  |
| LP -> Afli<br>2q8             | 77% | 0.97 [0.61,1.54]            | 55%  | 73%            | 1.00 [0.68, 1.48] | 50%  |
| LP -> Rani<br>0.5q12          | 63% | 0.74 [0.19,3.21]            | 66%  | -              | -                 | -    |
| LP -> Rani<br>0.5q8           | 37% | 0.41 [0.11,1.56]            | 90%  | -              | -                 | -    |
| Afli 2q4                      | 77% | 0.97 [0.47,2.01]            | 53%  | 69%            | 0.97 [0.54, 1.71] | 55%  |
| LP -> Rani<br>0.5TRES         | 60% | 0.71 [0.29,1.74]            | 77%  | 39%            | 0.65 [0.26, 1.61] | 82%  |
| Rani 0.5PRN                   | 69% | 0.83 [0.29,2.36]            | 64%  | 57%            | 0.82 [0.28, 2.2]  | 66%  |
| LP -> Bro<br>6q12/q8          | 78% | -                           | -    | 72%            | -                 | -    |
| LP -> Bro<br>3q12/q8          | 78% | 1.01 [0.56,1.84]            | 49%  | 61%            | 0.89 [0.54, 1.47] | 68%  |
| Sham IVT                      | 3%  | 0.07 [0.03,0.19]            | 100% | 0%             | 0.11 [0.05, 0.23] | 100% |
| LP -> Rani<br>0.5PRNX         | 31% | 0.30 [0.04,2.00]            | 89%  | -              | -                 | -    |
| LP -> Afli<br>2TRES           | 40% | 0.42 [0.08,2.12]            | 85%  | 48%            | 0.70 [0.16, 3.17] | 68%  |
| Bev<br>1.25TRES               | 66% | 0.81 [0.20,3.29]            | 62%  | 63%            | 0.91 [0.28, 3.01] | 56%  |
| LP -> Bev<br>1.25PRN          | 32% | 0.36 [0.10,1.20]            | 95%  | -              | -                 | -    |
| Bev 1.25q6                    | 29% | 0.28 [0.04,1.59]            | 92%  | -              | -                 | -    |
| LP (q26) -><br>Bev 1.25q12    | 19% | 0.16 [0.01,1.62]            | 94%  | -              | -                 | -    |
| Bev 1.25q4                    | 44% | 0.52 [0.21,1.27]            | 93%  | 53%            | 0.77 [0.25, 2.33] | 68%  |
| Bev<br>1.25PRN                | 35% | 0.42 [0.16,1.11]            | 96%  | 22%            | 0.48 [0.17, 1.24] | 93%  |
| LP (4q4) -><br>Fari 6q8-q16   | 72% | 0.9 [0.45,1.82]             | 61%  | -              | -                 | -    |
| LP (4q4) -><br>Fari 6q16      | 49% | 0.48 [0.32,0.7]             | 63%  | -              | -                 | -    |

| <b>Patients<br/>gaining at<br/>least 15<br/>letters</b> |     |                    |      |     | <b>1 year</b>       |      | <b>2 years</b> |  |
|---------------------------------------------------------|-----|--------------------|------|-----|---------------------|------|----------------|--|
|                                                         |     |                    |      |     |                     |      |                |  |
| Rani 0.5q4                                              | 60% | 1.12 [0.81,1.57]   | 75%  | 49% | 1.22 [0.88, 1.69]   | 88%  |                |  |
| LP -> Rani<br>0.5PRN                                    | 56% | 1.16 [0.73,1.84]   | 74%  | 42% | 1.3 [0.80, 2.10]    | 85%  |                |  |
| LP -> Afli<br>2q8                                       | 51% | 1.2 [0.95,1.50]    | 94%  | 62% | 1.11 [0.89, 1.39]   | 83%  |                |  |
| LP -> Rani<br>0.5q12                                    | 5%  | 7.72 [1.94,30.76]  | 100% | -   | -                   | -    |                |  |
| LP -> Rani<br>0.5q8                                     | 37% | 1.41 [0.74,2.69]   | 85%  | -   | -                   | -    |                |  |
| Afli 2q4                                                | 67% | 1.07 [0.77,1.49]   | 65%  | 45% | 1.24 [0.90, 1.73]   | 90%  |                |  |
| LP -> Rani<br>0.5TREX                                   | 69% | 1.05 [0.69,1.59]   | 59%  | 73% | 1.02 [0.61, 1.70]   | 53%  |                |  |
| Rani 0.5PRN                                             | 22% | 1.65 [1.02,2.68]   | 98%  | 40% | 1.34 [0.77, 2.34]   | 85%  |                |  |
| LP -> Bro<br>6q12/q8                                    | 74% | -                  | -    | 77% | -                   | -    |                |  |
| LP -> Bro<br>3q12/q8                                    | 37% | 1.37 [1.01,1.86]   | 98%  | 80% | 0.96 [0.72, 1.29]   | 40%  |                |  |
| Sham IVT                                                | 1%  | 11.11 [5.53,23.86] | 100% | 0%  | 16.09 [7.55, 37.64] | 100% |                |  |
| LP -> Rani<br>0.5PRNX                                   | 85% | 0.66 [0.21,2.01]   | 23%  | -   | -                   | -    |                |  |
| LP -> Afli<br>2TREX                                     | 57% | 1.15 [0.55,2.4]    | 64%  | 34% | 1.49 [0.66, 3.43]   | 83%  |                |  |
| Bev<br>1.25TREX                                         | 60% | 1.11 [0.6,2.09]    | 63%  | 73% | 0.98 [0.49, 1.97]   | 48%  |                |  |
| LP -> Bev<br>1.25PRN                                    | 51% | 1.21 [0.67,2.16]   | 74%  | -   | -                   | -    |                |  |
| Bev 1.25q4                                              | 61% | 1.12 [0.72,1.74]   | 69%  | 47% | 1.28 [0.69, 2.37]   | 78%  |                |  |
| LP (4q4) -><br>Fari 6q12                                | 47% | 1.35 [0.33,5.54]   | 66%  | -   | -                   | -    |                |  |
| Bev<br>1.25PRN                                          | 35% | 1.4 [0.87,2.29]    | 92%  | 27% | 1.51 [0.86, 2.64]   | 92%  |                |  |
| LP (4q4) -><br>Fari 6q16                                | 74% | 0.8 [0.21,2.92]    | 37%  | -   | -                   | -    |                |  |
| <b>Discontinuati<br/>on</b>                             |     |                    |      |     |                     |      |                |  |
|                                                         |     | <b>1 year</b>      |      |     | <b>2 years</b>      |      |                |  |
| Rani 0.5q4                                              | 48% | 1.00 [0.59,1.71]   | 49%  | 33% | 0.94 [0.61, 1.41]   | 38%  |                |  |
| LP -> Afli<br>2q8                                       | 36% | 0.87 [0.61,1.25]   | 77%  | 12% | 0.81 [0.61, 1.06]   | 7%   |                |  |
| LP -> Rani<br>0.5PRN                                    | 69% | 1.35 [0.57,3.26]   | 25%  | 71% | 1.24 [0.66, 2.32]   | 75%  |                |  |
| LP -> Rani<br>0.5q8                                     | 93% | 4.6 [0.63,46.15]   | 7%   | -   | -                   | -    |                |  |
| Afli 2q4                                                | 63% | 1.17 [0.67,2.02]   | 29%  | 42% | 0.98 [0.64, 1.48]   | 45%  |                |  |
| LP -> Rani<br>0.5TREX                                   | 69% | 1.28 [0.67,2.44]   | 23%  | 76% | 1.28 [0.71, 2.28]   | 79%  |                |  |



|                             |     |                   |     |     |                   |     |
|-----------------------------|-----|-------------------|-----|-----|-------------------|-----|
| LP -> Bro<br>6q8 -> q12     | 58% | 1.2 [0.23,7.14]   | 41% | -   | -                 | -   |
| LP -> Bro<br>6q12/q8        | 49% | -                 | -   | 46% | -                 | -   |
| LP -> Bro<br>3q12/q8        | 69% | 1.29 [0.81,2.10]  | 14% | 59% | 1.09 [0.76, 1.57] | 68% |
| LP -> Afli<br>2TRES         | 52% | 1.06 [0.38,2.91]  | 46% | 41% | 0.97 [0.42, 2.24] | 47% |
| Bev<br>1.25TRES             | 65% | 1.27 [0.5,3.2.00] | 30% | 70% | 1.27 [0.60, 2.67] | 73% |
| Bev 1.25q4                  | 32% | 0.79 [0.37,1.69]  | 72% | -   | -                 | -   |
| LP (4q4) -><br>Fari 6q8-q16 | 26% | 0.73 [0.41,1.30]  | 86% | -   | -                 | -   |
| LP (4q4) -><br>Fari 6q12    | 8%  | 0.10 [0.00,1.77]  | 93% | -   | -                 | -   |
| LP (4q4) -><br>Fari 6q16    | 13% | 0.14 [0.00,2.35]  | 90% | -   | -                 | -   |

\*Comparison corresponds to odds ratio for patients losing at least 15 letters, patients gaining at least 15 letters and discontinuation and corresponds to mean differences for mean change in BCVA and mean change in retinal thickness
